# Supplementary material for: Association between secondhand smoke exposure and hypertension in never smokers: a cross-sectional survey using data from Korean National Health and Nutritional Examination Survey V, 2010–2012
Source: PubMed Central journal article supplement — BMJ Open. 2018 May 14;8(5):e021217. doi: 10.1136/bmjopen-2017-021217 (PMC5961559; doi:10.1136/bmjopen-2017-021217), 2018-05-14
Supplement: bmjopen-2017-021217.draft_revisions.pdf [file bmjopen-2017-021217.draft_revisions.pdf]

# BMJ Open

BMJ Open is committed to open peer review. As part of this commitment we make the peer review history of every article we publish publicly available.

When an article is published we post the peer reviewers' comments and the authors' responses online. We also post the versions of the paper that were used during peer review. These are the versions that the peer review comments apply to.

The versions of the paper that follow are the versions that were submitted during the peer review process. They are not the versions of record or the final published versions. They should not be cited or distributed as the published version of this manuscript.

BMJ Open is an open access journal and the full, final, typeset and author-corrected version of record of the manuscript is available on our site with no access controls, subscription charges or pay-per-view fees (<http://bmjopen.bmj.com>).

If you have any questions on BMJ Open's open peer review process please email [info.bmjopen@bmj.com](mailto:info.bmjopen@bmj.com)

# BMJ Open

## Second-hand smoke exposure is associated with hypertension in female never smokers: a cross-sectional survey design study using data from KNHANES 2010-2012

|                               |                                                                                                                                                                                                                                                                                                                                                                                                                                                                                                                                                                                                                                                                                                                                                                                                                                                                                                                                                                                                                                              |
|-------------------------------|----------------------------------------------------------------------------------------------------------------------------------------------------------------------------------------------------------------------------------------------------------------------------------------------------------------------------------------------------------------------------------------------------------------------------------------------------------------------------------------------------------------------------------------------------------------------------------------------------------------------------------------------------------------------------------------------------------------------------------------------------------------------------------------------------------------------------------------------------------------------------------------------------------------------------------------------------------------------------------------------------------------------------------------------|
| Journal:                      | <i>BMJ Open</i>                                                                                                                                                                                                                                                                                                                                                                                                                                                                                                                                                                                                                                                                                                                                                                                                                                                                                                                                                                                                                              |
| Manuscript ID                 | bmjopen-2017-021217                                                                                                                                                                                                                                                                                                                                                                                                                                                                                                                                                                                                                                                                                                                                                                                                                                                                                                                                                                                                                          |
| Article Type:                 | Research                                                                                                                                                                                                                                                                                                                                                                                                                                                                                                                                                                                                                                                                                                                                                                                                                                                                                                                                                                                                                                     |
| Date Submitted by the Author: | 15-Dec-2017                                                                                                                                                                                                                                                                                                                                                                                                                                                                                                                                                                                                                                                                                                                                                                                                                                                                                                                                                                                                                                  |
| Complete List of Authors:     | <p>Park, Young Sik; Seoul National University College of Medicine, Internal Medicine</p> <p>Lee, Chang-Hoon; Seoul National University Hospital, Internal Medicine</p> <p>Kim, Yu-Il; Chonnam National University Hospital, Internal Medicine</p> <p>Ahn, Chul Min; Yonsei University College of Medicine, Internal Medicine</p> <p>Kim, Ju Ock; Chungnam National University School of Medicine, Internal Medicine</p> <p>Park, Ju-Heon; Ajou University School of Medicine and Graduate School of Medicine, Internal Medicine</p> <p>Lee, Sang-Haak; Catholic University of Korea School of Medicine, Internal Medicine</p> <p>Kim, Jae Yeol; Chung-Ang University College of Medicine and Graduate School of Medicine, Internal Medicine</p> <p>Chun, Eun Mi; Ewha Women's University College of Medicine and Graduate School of Medicine, Internal Medicine</p> <p>Jung, Tae-Hoon; Kyungpook National University School of Medicine, Internal Medicine</p> <p>Yoo, Kwang-Ha; Konkuk University School of Medicine, Internal Medicine</p> |
| Keywords:                     | second-hand smoke, Hypertension < CARDIOLOGY, blood pressure, KNHANES                                                                                                                                                                                                                                                                                                                                                                                                                                                                                                                                                                                                                                                                                                                                                                                                                                                                                                                                                                        |

SCHOLARONE™  
Manuscripts

1  
2  
3  
4  
5 **Second-hand smoke exposure is associated with hypertension in female**  
6  
7 **never smokers: a cross-sectional survey design study using data from**  
8  
9 **KNHANES 2010-2012**  
10  
11  
12  
13

14 Young Sik Park,<sup>1</sup> Chang-Hoon Lee,<sup>1</sup> Yu-Il Kim,<sup>2</sup> Chul Min Ahn,<sup>3</sup> Ju Ock Kim,<sup>4</sup> Ju-  
15 Heon Park,<sup>5</sup> Sang Haak Lee,<sup>6</sup> Jae Yeol Kim,<sup>7</sup> Eun Mi Chun,<sup>8</sup> Tae-Hoon Jung,<sup>9</sup> Kwang-  
16 Ha Yoo<sup>10</sup>  
17  
18  
19  
20  
21  
22

23 <sup>1</sup> Department of Internal Medicine, Seoul National University College of Medicine,  
24 Seoul, Korea  
25  
26

27 <sup>2</sup>Department of Internal Medicine, Chonnam National University Hospital, Gwangju  
28 Korea  
29  
30

31 <sup>3</sup>Department of Internal Medicine, Yonsei University College of Medicine, Seoul,  
32 Korea  
33  
34

35 <sup>4</sup>Department of Internal Medicine, Chungnam National University School of Medicine,  
36 Daejeon, Korea  
37  
38

39 <sup>5</sup>Department of Internal Medicine, Ajou University School of Medicine, Suwon, Korea  
40  
41

42 <sup>6</sup>Department of Internal Medicine, The Catholic University of Korea, College of  
43 Medicine, Seoul, Korea  
44  
45

46 <sup>7</sup>Department of Internal Medicine, Chung-Ang University College of Medicine, Seoul,  
47 Korea  
48  
49

50 <sup>8</sup>Department of Internal Medicine, Ewha Womans University School of Medicine,  
51 Seoul, Korea  
52  
53  
54  
55  
56  
57

1  
2  
3  
4  
5 <sup>9</sup>Department of Internal Medicine, Chilgok Kyungpook National University School of  
6  
7 Medicine, Daegu, Korea

8  
9 <sup>10</sup>Department of Internal Medicine, Konkuk University College of Medicine, Seoul,  
10  
11 Korea

12  
13  
14  
15  
16 **Corresponding author:** Chang-Hoon Lee, MD, PhD

17  
18 Associate professor, Division of Pulmonary and Critical Care Medicine, Department of  
19  
20 Internal Medicine, Seoul National University College of Medicine, Seoul National  
21  
22 University Hospital, 101 Daehak-Ro Jongno-Gu, Seoul, 03080, Republic of Korea Tel:  
23  
24 +82-2-2072-4743 Fax: +82-2-762-9662

25  
26 E-mail: kauri670@empal.com

27  
28  
29  
30  
31 **Running title:** second-hand smoking exposure and hypertension

## Abstract

**Objectives:** Second-hand smoke (SHS) exposure is associated with cardiovascular disease. This study aims to determine the association between SHS exposure estimated by questionnaire and hypertension in Korean female never smokers.

**Setting:** Korean National Health and Nutrition Examination Survey (KNHANES) V was conducted from 2010 to 2012.

**Participants:** We selected the female population with never smokers aged over 20.

**Primary and secondary measures:** SHS exposure in both the home and work place was estimated using a self-reporting questionnaire. We evaluated the association between SHS exposure and hypertension by using survey design analysis. And we calculated systolic and diastolic blood pressure according to SHS exposure.

**Results:** There were 8,987 female never smokers. We divided the subjects into three groups according to the amount of SHS exposure: none—group I, <2hr/day—group II, and  $\geq$ 2hr/day—group III. Using multivariate analysis, hypertension was more commonly associated with group III than group I (adjusted OR=1.50, 95% CI: 1.00–2.04,  $P=0.011$ ). Adjusted systolic and diastolic blood pressures in the population who had not been diagnosed with hypertension by their doctors and was not taking antihypertensive medication were significantly elevated in group III ( $P=0.030$  and  $P=0.011$ , respectively).

**Conclusion:** SHS exposure is significantly associated with hypertension in female never smokers.

**Keywords:** second-hand smoke, hypertension, blood pressure, KNHANES

### **Strengths and limitations of this study**

- This study demonstrated hypertension is more common in female never smokers with higher daily second-hand smoke (SHS) exposure and measured the differences of systolic and diastolic pressure between the groups.
- This study included the largest population (8,987) used to examine SHS exposure based on a well-structured nationwide survey.
- Survey design analysis was applied to reduce the possibility of biased estimates.
- This cross-sectional analysis could not conclude the causal relationship between SHS exposure and hypertension.

## INTRODUCTION

With a global prevalence of 26.4%,<sup>1</sup> hypertension is a large contributor to the burden of disease in adults. Well-known risk factor of hypertension is family history, but it is non-modifiable. Active cigarette smoking is another risk factor,<sup>2</sup> and it is totally preventable.<sup>3</sup>

Active smoking causes detrimental effects on smokers themselves, but second-hand smoke (SHS) exposure can also harm innocent bystanders. About 85% of SHS exposure results from sidestream smoke, which rises from the tip of a burning cigarette.<sup>4</sup> Sidestream smoke is potentially more harmful because it is not filtered. In recent years, the public has paid more attention to the harmful effect of SHS exposure on cardiovascular diseases<sup>5</sup> and supportive evidence is accumulating.<sup>6-8</sup> Although the positive relationship between SHS exposure and hypertension has been reported, some studies did not confirm this relationship.<sup>9</sup> In Korea, the adult smoking rate was 24.1% in 2013, and there was a big difference between sexes, 42.1% in men and 6.2% in women. Therefore, women are more vulnerable to SHS exposure. The aim of this study was to elucidate the association between SHS exposure and hypertension in Korean female never smokers using national survey data.

## MATERIALS AND METHODS

### Study population

1  
2  
3  
4  
5 The detailed data obtained from the fifth Korean National Health and Nutrition  
6 Examination Survey (KNHANES) V 2010-2012 are described elsewhere.<sup>10</sup> KNHANES  
7 is an annual collection of data from the Korean Statistical Office census of 3,800  
8 households from 576 randomly selected survey areas with the number selected from  
9 each area proportional to its size. Trained interviewers administer questionnaires on  
10 various health-related information, and subjects self-report their alcohol and smoking  
11 habits. KNHANES uses a complex, multi-stage probability sample design. The sample  
12 represents the total non-institutionalized civilian population of Korea. These data are  
13 available on the internet (<https://knhanes.cdc.go.kr>). Adult female never smokers >20  
14 years old with second hand smoking history available were included. Never smoker was  
15 defined when the total amount of smoking was <100 cigarettes during the lifetime. If  
16 histories of smoking or SHS exposure were not available, the cases were excluded. The  
17 institutional review board of Seoul National University Hospital waived the need for  
18 written informed consent from the participants (IRB no: H1509-011-699).  
19  
20  
21  
22  
23  
24  
25  
26  
27  
28  
29  
30  
31  
32  
33  
34  
35  
36

### 37 **Definition of SHS exposure**

38 Daily SHS exposure time was estimated both in the workplace and home. Total SHS  
39 exposure was calculated by the summation of both values. The total amount of SHS  
40 exposure was categorized into three groups according to exposure time; none (group I),  
41 <2hr/day (group II), and  $\geq$ 2hr/day (group III).  
42  
43  
44  
45  
46  
47  
48  
49

### 50 **Definition of hypertension**

51 Hypertension was defined if one or more of the criteria below were met. 1) diagnosed  
52 by physician, 2) using anti-hypertensive medications, 3) systolic blood pressure (BP)  
53  
54  
55  
56  
57



1  
2  
3  
4  
5  $\geq 140$  mmHg, 4) diastolic BP  $\geq 90$  mmHg. The measurement of BP was available  
6  
7 elsewhere.<sup>11</sup> In brief, after at least 5 minutes rest in seating position, BP was manually  
8  
9 measured 3 times at 30-second intervals. Finally, the average of the 2<sup>nd</sup> and 3<sup>rd</sup>  
10  
11 measurements were used.  
12

### 13 14 15 16 **Statistical analysis**

17  
18 Weighted analysis was used for the KNHANES V data.  $\chi^2$  test was used for categorical  
19  
20 variables and *t*-test was used for continuous variables in univariate analysis.<sup>12</sup>  
21  
22 Multivariable logistic regression with survey weight analysis was conducted to evaluate  
23  
24 the association between SHS and hypertension. In model 1, the only variable was age  
25  
26 and in model 2, multiple covariates included age, body mass index (BMI), education,  
27  
28 occupation, socioeconomic status, alcohol intake, marital status, diabetes, and serum  
29  
30 total cholesterol were adjusted. In addition, we compared SBP and DBP between groups,  
31  
32 in which covariates were also adjusted. This analysis was limited to participants who  
33  
34 had not been diagnosed with hypertension by their physician and were not taking  
35  
36 antihypertensive medications. *P*-value  $< 0.05$  was considered significant. We used the  
37  
38 STATA software version 13.1 (StataCorp, College Station, Texas, US) for statistical  
39  
40 analysis.  
41  
42  
43  
44  
45  
46  
47

## 48 **RESULTS**

### 49 50 51 52 **Baseline characteristics of participants**

1  
2  
3  
4  
5 The KNHANES V data include 25,534 participants. Among them, we found 10,915  
6 female adults (age >20 years old). After excluding 822 participants with unknown  
7 smoking history, 1,084 ever-smokers, and 22 with unknown SHS exposure, a total of  
8 8,987 female never smokers were available for analysis (Figure 1). Their mean age was  
9 47.7±0.3 years. The majority of the study population was light drinkers (<1/week), and  
10 socioeconomic status was evenly distributed (Table 1). The percentages of  
11 participants categorized into group I, II, and III according to the degree of their SHS  
12 exposures were 68.1%, 24.2% and 7.7%. The participants in group I were older than  
13 those in other groups (49.6 vs. 42.9 and 45.2 years old;  $P<0.001$ ). The percentages of  
14 hypertension in group I, II, and III were 29.3%, 19.3% and 25.9%, respectively  
15 ( $P<0.001$ ). Systolic and diastolic BP, education level, alcohol intake, marital status, and  
16 the prevalence of diabetes were significantly different between groups.  
17  
18  
19  
20  
21  
22  
23  
24  
25  
26  
27  
28  
29  
30  
31  
32

### 33 **Hypertension is associated with SHS exposure measured by questionnaire in** 34 **female never smokers** 35

36  
37 Hypertension was significantly associated with SHS exposure (group III) after  
38 adjustment for age (model 1, adjusted OR=1.49, 95% CI: 1.14–1.93,  $P=0.003$ ) and even  
39 after adjustment for age, height, weight, waist circumference, serum triglyceride, fasting  
40 glucose, education, occupation, alcohol intake, and marital status (model 2, adjusted  
41 OR=1.50, 95% CI: 1.10–2.04,  $P=0.011$ , Table 2).  
42  
43  
44  
45  
46  
47  
48  
49  
50

### 51 **Systolic and diastolic blood pressure is increasing according to SHS exposure** 52

53 The mean systolic and diastolic BP increased proportional to the increasing SHS  
54 exposure. On average, the differences between group III and group I were 2.3 mmHg  
55  
56  
57

1  
2  
3  
4  
5 and 1.7 mmHg in systolic and diastolic BP, respectively ( $P=0.030$  and  $P=0.011$ ) (Figure  
6  
7 2).  
8  
9

## 10 11 12 13 **DISCUSSION**

14  
15 This study demonstrated the association between SHS exposure measured by self-  
16 reported questionnaire in female never smokers and hypertension, using a well-designed  
17 nationwide surveillance data.<sup>13</sup> Our findings strengthen the evidence of the harmful  
18 effect of chronic SHS exposure on hypertension. Additionally, we calculated the degree  
19 of elevated mean systolic and diastolic BP in group III ( $\geq 2$ hr/day): 2.3 and 1.7mmHg,  
20 respectively. According to a previous study, a 3mmHg systolic BP difference was  
21 observed with a 10 kg increase body weight.<sup>14</sup> Compared to this 3 mmHg systolic BP  
22 change accomplished by weight reduction, the value of 2.3 mmHg associated with SHS  
23 exposure is significant.  
24  
25  
26  
27  
28  
29  
30  
31  
32  
33  
34  
35  
36

37 Pharmacologically, nicotine stimulates the sympathetic nervous system in active  
38 smokers.<sup>15 16</sup> Epinephrine and norepinephrine are released by nicotine stimulation, and  
39 these catecholamines increase myocardial contractility and promote vasoconstriction,  
40 which results in increases in BP.<sup>17</sup> The association between smoking and hypertension  
41 has also been observed in a mouse model,<sup>18</sup> and in epidemiologic studies.<sup>2</sup> Moreover,  
42 the amount of smoking was positively correlated with hypertension<sup>19</sup> and carotid artery  
43 atherosclerosis severity.<sup>20</sup> The biologic effect of SHS exposure on BP could be  
44 extrapolated from the effects of active smoking. Plasma nicotine level was increased  
45 after SHS exposure in healthy nonsmokers.<sup>21</sup> In the context of active smoking exposure,  
46  
47  
48  
49  
50  
51  
52  
53  
54  
55  
56  
57  
58  
59  
60

1  
2  
3  
4  
5 the duration or amount of SHS exposure is also important in the evaluation of the  
6 chronic effect of passive smoking. Although the experimental studies of short-term SHS  
7 exposure did not demonstrate a change in BP.<sup>21 22</sup> population-based studies have shown  
8 that the habitual SHS exposure is associated with hypertension.<sup>6 7</sup>  
9  
10  
11  
12  
13

14  
15 Theoretically, SHS exposure can be determined by direct measurements of smoke  
16 components in the air, self-reported questionnaires, or by measurements of biomarkers  
17 from body fluid, such as serum, urine or saliva.<sup>23</sup> The correlation between self-reported  
18 questionnaire and biochemical assessment has been generally accurate in prior meta-  
19 analysis.<sup>24</sup> The association between hypertension and SHS exposure was demonstrated  
20 by using serum cotinine in the previous study<sup>6</sup> and self-reported questionnaire in our  
21 study. Compared to biomarkers, self-reported questionnaires are inexpensive and  
22 provide information on long-term exposure.  
23  
24  
25  
26  
27  
28  
29  
30  
31  
32  
33  
34

35 To our knowledge, this study included the largest population used to examine SHS  
36 exposure based on a well-structured nationwide survey (KNHANES V),<sup>13</sup> and a survey  
37 design analysis was applied to reduce the possibility of biased estimates.<sup>12</sup> In addition,  
38 we included various confounding factors, including age, height, weight, waist  
39 circumference, serum triglyceride, fasting glucose, education, occupation, alcohol  
40 intake and marital status in the statistical model to clarify the conclusion. However there  
41 were some limitations. First, we included only women, because of two considerations:  
42 the small population of male never smokers and the possibility of an association  
43 between SHS exposure and sex. In our dataset, the proportion of male never smokers  
44 was 20.2% of total never smokers. We thought that the small proportion of male never  
45  
46  
47  
48  
49  
50  
51  
52  
53  
54  
55  
56  
57  
58  
59  
60

1  
2  
3  
4  
5 smokers would not represent the nationwide population. Another consideration was  
6  
7 interaction. Smoking could influence cardiovascular disease due to sex-dependent  
8  
9 biologic effect.<sup>25</sup> Second, our cross-sectional analysis could not conclude the causal  
10  
11 relationship between SHS exposure and hypertension. For example, in some cases,  
12  
13 hypertension may have been present before exposure to SHS. Third, information on the  
14  
15 smoke concentration and the environment where SHS exposure occurred was not  
16  
17 available. Fourth, we could not exclude hidden smokers. The proportion of cotinine-  
18  
19 verified active smokers was previously noted to be larger than that of self-reported  
20  
21 smokers.<sup>26</sup> In our dataset (KNHANES V), urine cotinine level was available in 19% of  
22  
23 female never smokers. In that group, 2.7% female never smokers had a urine cotinine  
24  
25 level >200 ng/mL, the cutoff value defining an active smoker.<sup>23</sup> Thus, the possibility of  
26  
27 active smoker contamination does exist. Fifth, there could be concerns that factors  
28  
29 related with hypertension were not sufficiently investigated. For example, estrogen  
30  
31 increases the susceptibility to hypertension<sup>27</sup>. Because estrogen tends to rise in  
32  
33 perimenopausal period, perimenopausal women hence are likely to become  
34  
35 hypertensive. Although our survey did not measure the estrogen level, the analysis in  
36  
37 which perimenopausal participants were excluded also shows the significant  
38  
39 relationship between SHS exposure and hypertension (data not shown). A family  
40  
41 history of hypertension could also contribute on the development of hypertension. We  
42  
43 did not exclude participants who had a family history of hypertension. However, even  
44  
45 when participants with a self-reported family history of hypertension were excluded, the  
46  
47 significant relationship between SHS exposure and hypertension was also observed  
48  
49  
50  
51  
52 (data not shown).  
53  
54  
55  
56  
57  
58  
59  
60

1  
2  
3  
4  
5 In conclusion, on using self-reported questionnaires, we found that SHS exposure was  
6 significantly associated with hypertension in Korean female never smokers. Both  
7 systolic and diastolic blood pressures were significantly elevated in the SHS exposed  
8 population.  
9  
10  
11  
12  
13  
14  
15  
16  
17  
18  
19  
20  
21  
22  
23  
24  
25  
26  
27  
28  
29  
30  
31  
32  
33  
34  
35  
36  
37  
38  
39  
40  
41  
42  
43  
44  
45  
46  
47  
48  
49  
50  
51  
52  
53  
54  
55  
56  
57  
58  
59  
60

For peer review only

1  
2  
3  
4  
5 **Funding:** This research received no specific grant from any funding agency in the  
6 public, commercial or not-for-profit sectors.  
7  
8  
9

10  
11 **Competing interests:** None declared.  
12  
13

### 14 **Author Contributions**

15  
16 Conceptualization: YSP, CHL

17  
18 Data curation: YSP, CHL, YIL

19  
20 Methodology: YSP, CHL, KHY

21  
22 Project administration: CHL

23  
24 Original draft: YSP, CHL

25  
26 Review & editing: YSP, CHL, YIL, CMA, JOK, JHP, SHL, JYK, EMC, THJ, KHY  
27  
28  
29  
30  
31  
32

33 **Patient consent:** Waived from IRB  
34  
35  
36

37 **Ethics approval:** Seoul National University Hospital IRB  
38  
39  
40  
41

42 **Data sharing statement:** The original data came from Korean National Health and  
43 Nutritional Examination Survey (<https://knhanes.cdc.go.kr/knhanes/eng/index.do>). All  
44 the data presented this manuscript are available from the corresponding author at  
45 kauri670@empal.com.  
46  
47  
48  
49  
50  
51

52 **Open Access:** This is an Open Access article distributed in accordance with the  
53 Creative Commons Attribution Non Commercial (CC BY-NC 4.0) license, which  
54  
55  
56  
57

1  
2  
3  
4  
5 permits others to distribute, remix, adapt, build upon this work non-commercially, and  
6  
7 license their derivative works on different terms, provided the original work is properly  
8  
9 cited and the use is non-commercial. See: [http://creativecommons.org/licenses/by-](http://creativecommons.org/licenses/by-nc/4.0/)  
10  
11 [nc/4.0/](http://creativecommons.org/licenses/by-nc/4.0/)  
12  
13  
14  
15  
16  
17  
18  
19  
20  
21  
22  
23  
24  
25  
26  
27  
28  
29  
30  
31  
32  
33  
34  
35  
36  
37  
38  
39  
40  
41  
42  
43  
44  
45  
46  
47  
48  
49  
50  
51  
52  
53  
54  
55  
56  
57  
58  
59  
60

For peer review only



**REFERENCES**

1. Bromfield S, Muntner P. High blood pressure: the leading global burden of disease risk factor and the need for worldwide prevention programs. *Curr Hypertens Rep* 2013;15:134-6.
2. Bowman TS, Gaziano JM, Buring JE, *et al*. A prospective study of cigarette smoking and risk of incident hypertension in women. *J Am Coll Cardiol* 2007;50:2085-92.
3. World Health Organization, World Heart Federation, World Stroke Organization. Global atlas on cardiovascular disease prevention and control. [http://www.who.int/cardiovascular\\_diseases/publications/atlas\\_cvd/en/](http://www.who.int/cardiovascular_diseases/publications/atlas_cvd/en/) Accessed Nov 27, 2017
4. Centers for Disease C. 1986 Surgeon General's report: the health consequences of involuntary smoking. *MMWR Morb Mortal Wkly Rep* 1986;35:769-70.
5. Jacobs M, Alonso AM, Sherin KM, *et al*. Policies to restrict secondhand smoke exposure: American College of Preventive Medicine Position Statement. *Am J Prev Med* 2013;45:360-7.
6. Alshaarawy O, Xiao J, Shankar A. Association of serum cotinine levels and hypertension in never smokers. *Hypertension* 2013;61:304-8.
7. Makris TK, Thomopoulos C, Papadopoulos DP, *et al*. Association of passive smoking with masked hypertension in clinically normotensive nonsmokers. *Am J Hypertens* 2009;22:853-9.
8. Li N, Li Z, Chen S, *et al*. Effects of passive smoking on hypertension in rural Chinese nonsmoking women. *J Hypertens* 2015;33:2210-4.

- 1  
2  
3  
4  
5 9. Xie B, Palmer PH, Pang Z, *et al*. Environmental tobacco use and indicators of  
6  
7 metabolic syndrome in Chinese adults. *Nicotine Tob Res* 2010;12:198-206.  
8  
9 10. Kweon S, Kim Y, Jang MJ, *et al*. Data resource profile: the Korea National Health  
10  
11 and Nutrition Examination Survey (KNHANES). *Int J Epidemiol* 2014;43:69-  
12  
13 77.  
14  
15 11. Lee HT, Shin J, Min SY, *et al*. The relationship between bone mineral density  
16  
17 and blood pressure in the Korean elderly population: the Korea National  
18  
19 Health and Nutrition Examination Survey, 2008-2011. *Clin Exp Hypertens*  
20  
21 2015;37:212-7.  
22  
23 12. Kim Y, Park S, Kim NS, *et al*. Inappropriate survey design analysis of the Korean  
24  
25 National Health and Nutrition Examination Survey may produce biased  
26  
27 results. *J Prev Med Public Health* 2013;46:96-104.  
28  
29 13. Kim Y. The Korea National Health and Nutrition Examination Survey  
30  
31 (KNHANES): current status and challenges. *Epidemiol Health*  
32  
33 2014;36:e2014002.  
34  
35 14. Poirier P, Giles TD, Bray GA, *et al*. Obesity and cardiovascular disease:  
36  
37 pathophysiology, evaluation, and effect of weight loss: an update of the  
38  
39 1997 American Heart Association Scientific Statement on Obesity and Heart  
40  
41 Disease from the Obesity Committee of the Council on Nutrition, Physical  
42  
43 Activity, and Metabolism. *Circulation* 2006;113:898-918.  
44  
45 15. Grassi G, Seravalle G, Calhoun DA, *et al*. Mechanisms responsible for  
46  
47 sympathetic activation by cigarette smoking in humans. *Circulation*  
48  
49 1994;90:248-53.  
50  
51  
52  
53  
54  
55  
56  
57  
58  
59  
60

- 1  
2  
3  
4  
5 16. Karakaya O, Barutcu I, Kaya D, *et al.* Acute effect of cigarette smoking on heart  
6  
7 rate variability. *Angiology* 2007;58:620-4.  
8  
9  
10 17. Benowitz NL. Cigarette smoking and cardiovascular disease: pathophysiology  
11  
12 and implications for treatment. *Prog Cardiovasc Dis* 2003;46:91-111.  
13  
14 18. Talukder MA, Johnson WM, Varadharaj S, *et al.* Chronic cigarette smoking  
15  
16 causes hypertension, increased oxidative stress, impaired NO bioavailability,  
17  
18 endothelial dysfunction, and cardiac remodeling in mice. *Am J Physiol Heart*  
19  
20 *Circ Physiol* 2011;300:H388-96.  
21  
22  
23 19. Thuy AB, Blizzard L, Schmidt MD, *et al.* The association between smoking and  
24  
25 hypertension in a population-based sample of Vietnamese men. *J Hypertens*  
26  
27 2010;28:245-50.  
28  
29  
30 20. Tell GS, Polak JF, Ward BJ, *et al.* Relation of smoking with carotid artery wall  
31  
32 thickness and stenosis in older adults. The Cardiovascular Health Study.  
33  
34 The Cardiovascular Health Study (CHS) Collaborative Research Group.  
35  
36 *Circulation* 1994;90:2905-8.  
37  
38  
39 21. Argacha JF, Adamopoulos D, Gujic M, *et al.* Acute effects of passive smoking on  
40  
41 peripheral vascular function. *Hypertension* 2008;51:1506-11.  
42  
43  
44 22. Hausberg M, Mark AL, Winniford MD, *et al.* Sympathetic and vascular effects of  
45  
46 short-term passive smoke exposure in healthy nonsmokers. *Circulation*  
47  
48 1997;96:282-7.  
49  
50  
51 23. Florescu A, Ferrence R, Einarson T, *et al.* Methods for quantification of  
52  
53 exposure to cigarette smoking and environmental tobacco smoke: focus on  
54  
55 developmental toxicology. *Ther Drug Monit* 2009;31:14-30.  
56  
57  
58  
59  
60

- 1  
2  
3  
4  
5 24. Patrick DL, Cheadle A, Thompson DC, *et al.* The validity of self-reported  
6  
7 smoking: a review and meta-analysis. *Am J Public Health* 1994;84:1086-93.  
8  
9 25. Zhang M, An Q, Yeh F, *et al.* Smoking-attributable mortality in American Indians:  
10  
11 findings from the Strong Heart Study. *Eur J Epidemiol* 2015;30:553-61.  
12  
13 26. Jung-Choi KH, Khang YH, Cho HJ. Hidden female smokers in Asia: a comparison  
14  
15 of self-reported with cotinine-verified smoking prevalence rates in  
16  
17 representative national data from an Asian population. *Tob Control*  
18  
19 2012;21:536-42.  
20  
21  
22 27. Subramanian M, Balasubramanian P, Garver H, *et al.* Chronic estradiol-17beta  
23  
24 exposure increases superoxide production in the rostral ventrolateral  
25  
26 medulla and causes hypertension: reversal by resveratrol. *Am J Physiol*  
27  
28 *Regul Integr Comp Physiol* 2011;300:R1560-8.  
29  
30  
31  
32  
33  
34  
35  
36  
37  
38  
39  
40  
41  
42  
43  
44  
45  
46  
47  
48  
49  
50  
51  
52  
53  
54  
55  
56  
57  
58  
59  
60

1  
2  
3  
4  
5 Figure 1. Flow diagram of study population.  
6  
7  
8

9 Figure 2. Adjusted means of systolic (A) and diastolic (B) blood pressure according to  
10 second-hand smoke exposure in a population without previous diagnosis of  
11 hypertension or antihypertensive treatment. The mean values are adjusted for age,  
12 height, weight, waist circumference, serum triglyceride, fasting glucose, education,  
13  
14  
15  
16  
17  
18  
19  
20  
21  
22  
23  
24  
25  
26  
27  
28  
29  
30  
31  
32  
33  
34  
35  
36  
37  
38  
39  
40  
41  
42  
43  
44  
45  
46  
47  
48  
49  
50  
51  
52  
53  
54  
55  
56  
57  
58  
59  
60  
occupation, alcohol intake, and marital status.

1  
2  
3  
4  
5 **Table 1. Baseline characteristics according to the degree of second-hand smoke**  
6 **exposure.**  
7  
8  
9  
10  
11  
12  
13  
14  
15  
16  
17  
18  
19  
20  
21  
22  
23  
24  
25  
26  
27  
28  
29  
30  
31  
32  
33  
34  
35  
36  
37  
38  
39  
40  
41  
42  
43  
44  
45  
46  
47  
48  
49  
50  
51  
52  
53  
54  
55  
56  
57  
58  
59  
60

For peer review only

| Variables                   | SHS exposure |           |           | P value |
|-----------------------------|--------------|-----------|-----------|---------|
|                             | None         | <2hr/day  | ≥2hr/day  |         |
| % of total                  | 68.1%        | 24.2%     | 7.7%      |         |
| Age (years)                 | 49.6±0.3     | 42.9±0.4  | 45.2±0.6  | <0.001* |
| Weight (kg)                 | 57.5±0.2     | 57.5±0.3  | 59.2±0.5  | <0.001* |
| Height (cm)                 | 156.6±0.1    | 157.9±0.2 | 157.8±0.3 | <0.001* |
| Waist Circumference (cm)    | 78.7±0.2     | 76.9±0.3  | 78.9±0.5  | 0.009*  |
| BMI (kg/m <sup>2</sup> )    | 23.5±0.1     | 23.1±0.1  | 23.8±0.2  | 0.536   |
| Blood pressure              |              |           |           |         |
| Systole (mmHg)              | 117.5±0.3    | 113.5±0.5 | 117.7±0.9 | <0.001* |
| Diastole (mmHg)             | 74.0±0.2     | 73.6±0.3  | 75.7±0.5  | 0.082   |
| Total cholesterol (mg/dL)   | 190.4±0.7    | 186.5±1.0 | 192.9±1.8 | 0.453   |
| HDL (mg/dL)                 | 55.2±0.3     | 55.6±0.6  | 57.7±1.1  | 0.068   |
| Triglyceride (mg/dL)        | 115.0±1.8    | 104.7±1.9 | 112.2±4.4 | 0.016*  |
| Fasting glucose (mg/dL)     | 95.9±0.4     | 93.6±0.5  | 95.1±0.9  | 0.008*  |
| Hypertension                | 29.3%        | 19.3%     | 25.9%     | <0.001* |
| Diabetes mellitus           | 14.8%        | 9.8%      | 10.0%     | <0.001* |
| Metabolic syndrome          | 25.6%        | 17.0%     | 18.8%     | <0.001* |
| Alcohol intake              |              |           |           | <0.001* |
| Never drinker               | 21.7%        | 11.2%     | 18.5%     |         |
| Former drinker              | 18.0%        | 13.9%     | 16.5%     |         |
| Light drinker (≤1/week)     | 53.9%        | 66.8%     | 57.3%     |         |
| Moderate drinker (2-3/week) | 5.1%         | 7.1%      | 6.2%      |         |
| Heavy drinker (≥4/week)     | 1.3%         | 1.0%      | 1.5%      |         |
| Marital status              | 88.8%        | 76.9%     | 84.1%     | <0.001* |
| Educational level           |              |           |           | <0.001* |
| Below middle school         | 30.4%        | 18.2%     | 26.8%     |         |
| Middle school               | 9.8%         | 9.9%      | 10.2%     |         |
| High school                 | 29.8%        | 39.9%     | 33.1%     |         |
| Above high school           | 30.1%        | 31.9%     | 30.0%     |         |
| Socioeconomic status        |              |           |           | 0.144   |
| 1Q                          | 25.3%        | 25.3%     | 27.3%     |         |
| 2Q                          | 26.8%        | 25.7%     | 21.2%     |         |
| 3Q                          | 25.3%        | 25.9%     | 23.7%     |         |
| 4Q                          | 22.6%        | 23.1%     | 27.9%     |         |
| Occupation                  |              |           |           | <0.001* |
| Manager or professional     | 11.0%        | 15.6%     | 11.8%     |         |
| Office worker               | 5.0%         | 14.3%     | 13.3%     |         |

|                            |       |       |       |
|----------------------------|-------|-------|-------|
| Service                    | 9.0%  | 22.3% | 42.4% |
| Farmer worker or fisherman | 6.0%  | 5.6%  | 5.0%  |
| Technician                 | 2.3%  | 4.8%  | 4.2%  |
| Labor worker               | 8.0%  | 12.8% | 11.6% |
| Unemployed (outside house) | 58.8% | 24.7% | 17.4% |

\*: P<0.05

BMI, body mass index; SHS, second-hand smoke

For peer review only



**Table 2. Association between second-hand smoke (SHS) exposure and hypertension.**

| For hypertension | Model 1 <sup>†</sup> |             |                | Model 2 <sup>‡</sup> |             |                |
|------------------|----------------------|-------------|----------------|----------------------|-------------|----------------|
|                  | Adjusted OR          | 95% CI      | <i>P</i> value | Adjusted OR          | 95% CI      | <i>P</i> value |
| SHS exposure     |                      |             |                |                      |             |                |
| None             | 1                    |             |                | 1                    |             |                |
| < 2hr/day        | 1.06                 | 0.90 – 1.25 | 0.487          | 1.01                 | 0.91 – 1.33 | 0.314          |
| ≥ 2hr/day        | 1.49                 | 1.14 – 1.93 | 0.003*         | 1.50                 | 1.10 – 2.04 | 0.011*         |

\**P*<0.05

<sup>†</sup>Adjusted for age.

<sup>‡</sup>Adjusted for age, height, weight, waist circumference, serum triglyceride, fasting glucose, education, occupation, alcohol intake, and marital status.

CI, confidence interval; OR, odds ratio; SHS, second-hand smoke

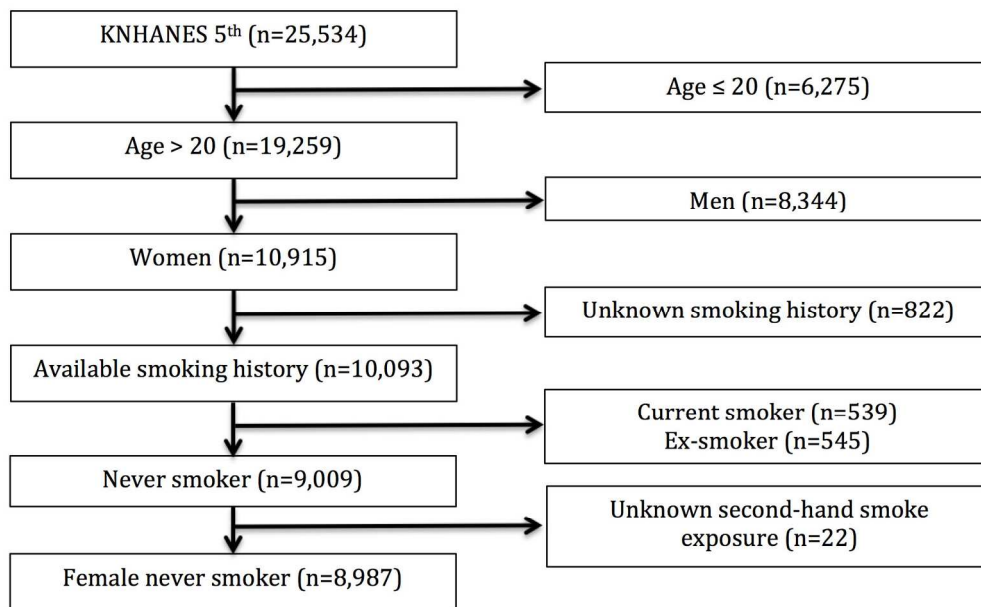

Figure 1. Flow diagram of study population.

344x212mm (143 x 143 DPI)

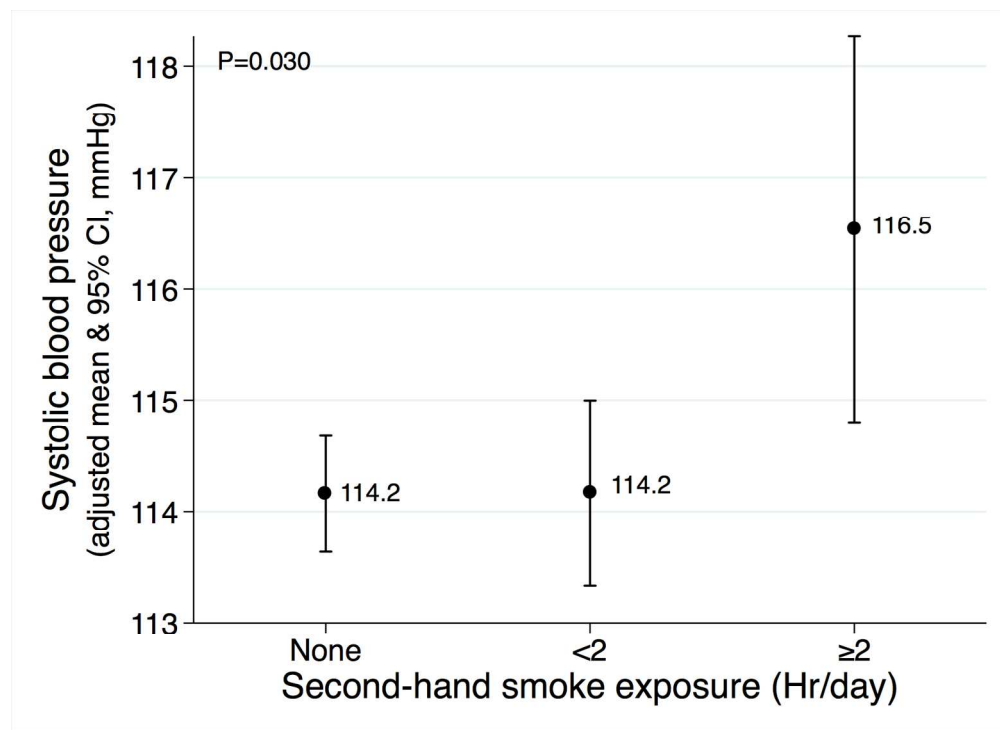

Figure 2. Adjusted means of systolic (A) and diastolic (B) blood pressure according to second-hand smoke exposure in a population without previous diagnosis of hypertension or antihypertensive treatment. The mean values are adjusted for age, height, weight, waist circumference, serum triglyceride, fasting glucose, education, occupation, alcohol intake, and marital status.

340x247mm (144 x 144 DPI)

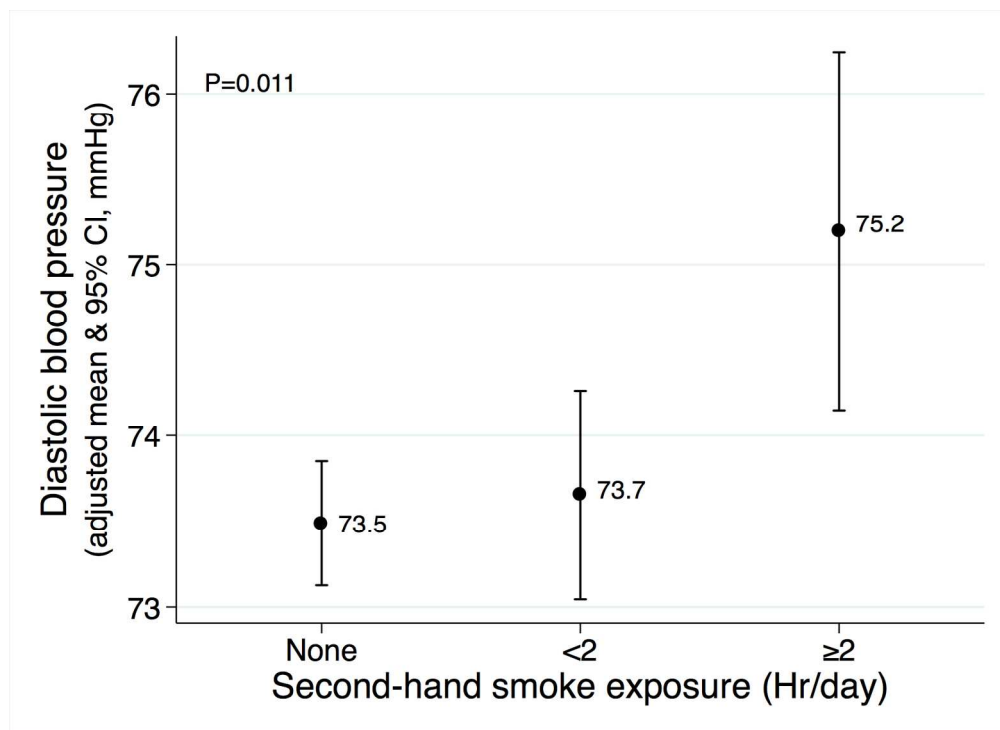

340x247mm (144 x 144 DPI)

ew only

**STROBE 2007 (v4) checklist of items to be included in reports of observational studies in epidemiology\***  
**Checklist for cohort, case-control, and cross-sectional studies (combined)**

| Section/Topic             | Item # | Recommendation                                                                                                                                                                                                                                                                                                                                                                                                                                                         | Reported on page # |
|---------------------------|--------|------------------------------------------------------------------------------------------------------------------------------------------------------------------------------------------------------------------------------------------------------------------------------------------------------------------------------------------------------------------------------------------------------------------------------------------------------------------------|--------------------|
| Title and abstract        | 1      | (a) Indicate the study’s design with a commonly used term in the title or the abstract                                                                                                                                                                                                                                                                                                                                                                                 | 1                  |
|                           |        | (b) Provide in the abstract an informative and balanced summary of what was done and what was found                                                                                                                                                                                                                                                                                                                                                                    | 3                  |
| <b>Introduction</b>       |        |                                                                                                                                                                                                                                                                                                                                                                                                                                                                        |                    |
| Background/rationale      | 2      | Explain the scientific background and rationale for the investigation being reported                                                                                                                                                                                                                                                                                                                                                                                   | 5                  |
| Objectives                | 3      | State specific objectives, including any pre-specified hypotheses                                                                                                                                                                                                                                                                                                                                                                                                      | 5                  |
| <b>Methods</b>            |        |                                                                                                                                                                                                                                                                                                                                                                                                                                                                        |                    |
| Study design              | 4      | Present key elements of study design early in the paper                                                                                                                                                                                                                                                                                                                                                                                                                | 6                  |
| Setting                   | 5      | Describe the setting, locations, and relevant dates, including periods of recruitment, exposure, follow-up, and data collection                                                                                                                                                                                                                                                                                                                                        | 6                  |
| Participants              | 6      | (a) <i>Cohort study</i> —Give the eligibility criteria, and the sources and methods of selection of participants. Describe methods of follow-up<br><i>Case-control study</i> —Give the eligibility criteria, and the sources and methods of case ascertainment and control selection. Give the rationale for the choice of cases and controls<br><i>Cross-sectional study</i> —Give the eligibility criteria, and the sources and methods of selection of participants | 6                  |
|                           |        | (b) <i>Cohort study</i> —For matched studies, give matching criteria and number of exposed and unexposed<br><i>Case-control study</i> —For matched studies, give matching criteria and the number of controls per case                                                                                                                                                                                                                                                 | 6                  |
| Variables                 | 7      | Clearly define all outcomes, exposures, predictors, potential confounders, and effect modifiers. Give diagnostic criteria, if applicable                                                                                                                                                                                                                                                                                                                               | 6                  |
| Data sources/ measurement | 8*     | For each variable of interest, give sources of data and details of methods of assessment (measurement). Describe comparability of assessment methods if there is more than one group                                                                                                                                                                                                                                                                                   | 6                  |
| Bias                      | 9      | Describe any efforts to address potential sources of bias                                                                                                                                                                                                                                                                                                                                                                                                              | 5-6                |
| Study size                | 10     | Explain how the study size was arrived at                                                                                                                                                                                                                                                                                                                                                                                                                              | 6                  |
| Quantitative variables    | 11     | Explain how quantitative variables were handled in the analyses. If applicable, describe which groupings were chosen and why                                                                                                                                                                                                                                                                                                                                           | 6                  |
| Statistical methods       | 12     | (a) Describe all statistical methods, including those used to control for confounding                                                                                                                                                                                                                                                                                                                                                                                  | 7                  |
|                           |        | (b) Describe any methods used to examine subgroups and interactions                                                                                                                                                                                                                                                                                                                                                                                                    | NE                 |
|                           |        | (c) Explain how missing data were addressed                                                                                                                                                                                                                                                                                                                                                                                                                            | 6                  |
|                           |        | (d) <i>Cohort study</i> —If applicable, explain how loss to follow-up was addressed<br><i>Case-control study</i> —If applicable, explain how matching of cases and controls was addressed                                                                                                                                                                                                                                                                              | 6                  |

|                          |     |                                                                                                                                                                                                              |          |
|--------------------------|-----|--------------------------------------------------------------------------------------------------------------------------------------------------------------------------------------------------------------|----------|
|                          |     | <i>Cross-sectional study</i> —If applicable, describe analytical methods taking account of sampling strategy                                                                                                 |          |
|                          |     | (e) Describe any sensitivity analyses                                                                                                                                                                        | NE       |
| <b>Results</b>           |     |                                                                                                                                                                                                              |          |
| Participants             | 13* | (a) Report numbers of individuals at each stage of study—eg numbers potentially eligible, examined for eligibility, confirmed eligible, included in the study, completing follow-up, and analysed            | 6        |
|                          |     | (b) Give reasons for non-participation at each stage                                                                                                                                                         | 6        |
|                          |     | (c) Consider use of a flow diagram                                                                                                                                                                           | Figure 1 |
| Descriptive data         | 14* | (a) Give characteristics of study participants (eg demographic, clinical, social) and information on exposures and potential confounders                                                                     | 7-8      |
|                          |     | (b) Indicate number of participants with missing data for each variable of interest                                                                                                                          | 7-8      |
|                          |     | (c) <i>Cohort study</i> —Summarise follow-up time (eg, average and total amount)                                                                                                                             |          |
| Outcome data             | 15* | <i>Cohort study</i> —Report numbers of outcome events or summary measures over time                                                                                                                          |          |
|                          |     | <i>Case-control study</i> —Report numbers in each exposure category, or summary measures of exposure                                                                                                         |          |
|                          |     | <i>Cross-sectional study</i> —Report numbers of outcome events or summary measures                                                                                                                           | 8        |
| Main results             | 16  | (a) Give unadjusted estimates and, if applicable, confounder-adjusted estimates and their precision (eg, 95% confidence interval). Make clear which confounders were adjusted for and why they were included | 8        |
|                          |     | (b) Report category boundaries when continuous variables were categorized                                                                                                                                    | 8        |
|                          |     | (c) If relevant, consider translating estimates of relative risk into absolute risk for a meaningful time period                                                                                             | NE       |
| Other analyses           | 17  | Report other analyses done—eg analyses of subgroups and interactions, and sensitivity analyses                                                                                                               | NE       |
| <b>Discussion</b>        |     |                                                                                                                                                                                                              |          |
| Key results              | 18  | Summarise key results with reference to study objectives                                                                                                                                                     | 8        |
| Limitations              | 19  | Discuss limitations of the study, taking into account sources of potential bias or imprecision. Discuss both direction and magnitude of any potential bias                                                   | 10-11    |
| Interpretation           | 20  | Give a cautious overall interpretation of results considering objectives, limitations, multiplicity of analyses, results from similar studies, and other relevant evidence                                   | 10-11    |
| Generalisability         | 21  | Discuss the generalisability (external validity) of the study results                                                                                                                                        | NE       |
| <b>Other information</b> |     |                                                                                                                                                                                                              |          |
| Funding                  | 22  | Give the source of funding and the role of the funders for the present study and, if applicable, for the original study on which the present article is based                                                | NE       |

\*Give information separately for cases and controls in case-control studies and, if applicable, for exposed and unexposed groups in cohort and cross-sectional studies.

**Note:** An Explanation and Elaboration article discusses each checklist item and gives methodological background and published examples of transparent reporting. The STROBE checklist is best used in conjunction with this article (freely available on the Web sites of PLoS Medicine at <http://www.plosmedicine.org/>, Annals of Internal Medicine at <http://www.annals.org/>, and Epidemiology at <http://www.epidem.com/>). Information on the STROBE Initiative is available at [www.strobe-statement.org](http://www.strobe-statement.org).

# BMJ Open

## The association between second-hand smoke exposure and hypertension in never smokers: a cross sectional survey using data from Korean National Health and Nutritional Examination Survey V, 2010-2012

|                                 |                                                                                                                                                                                                                                                                                                                                                                                                                                                                                                                                                                                                                                                                                                                                                                                                                                                                                                                                                                                               |
|---------------------------------|-----------------------------------------------------------------------------------------------------------------------------------------------------------------------------------------------------------------------------------------------------------------------------------------------------------------------------------------------------------------------------------------------------------------------------------------------------------------------------------------------------------------------------------------------------------------------------------------------------------------------------------------------------------------------------------------------------------------------------------------------------------------------------------------------------------------------------------------------------------------------------------------------------------------------------------------------------------------------------------------------|
| Journal:                        | <i>BMJ Open</i>                                                                                                                                                                                                                                                                                                                                                                                                                                                                                                                                                                                                                                                                                                                                                                                                                                                                                                                                                                               |
| Manuscript ID                   | bmjopen-2017-021217.R1                                                                                                                                                                                                                                                                                                                                                                                                                                                                                                                                                                                                                                                                                                                                                                                                                                                                                                                                                                        |
| Article Type:                   | Research                                                                                                                                                                                                                                                                                                                                                                                                                                                                                                                                                                                                                                                                                                                                                                                                                                                                                                                                                                                      |
| Date Submitted by the Author:   | 22-Mar-2018                                                                                                                                                                                                                                                                                                                                                                                                                                                                                                                                                                                                                                                                                                                                                                                                                                                                                                                                                                                   |
| Complete List of Authors:       | Park, Young Sik; Seoul National University College of Medicine, Internal Medicine<br>Lee, Chang-Hoon; Seoul National University Hospital, Internal Medicine<br>Kim, Yu-Il; Chonnam National University Hospital, Internal Medicine<br>Ahn, Chul Min; Yonsei University College of Medicine, Internal Medicine<br>Kim, Ju Ock; Chungnam National University School of Medicine, Internal Medicine<br>Park, Ju-Heon; Ajou University School of Medicine and Graduate School of Medicine, Internal Medicine<br>Lee, Sang-Haak; Catholic University of Korea School of Medicine, Internal Medicine<br>Kim, Jae Yeol; Chung-Ang University College of Medicine and Graduate School of Medicine, Internal Medicine<br>Chun, Eun Mi; Ewha Women's University College of Medicine and Graduate School of Medicine, Internal Medicine<br>Jung, Tae-Hoon; Kyungpook National University School of Medicine, Internal Medicine<br>Yoo, Kwang-Ha; Konkuk University School of Medicine, Internal Medicine |
| <b>Primary Subject Heading</b>: | Smoking and tobacco                                                                                                                                                                                                                                                                                                                                                                                                                                                                                                                                                                                                                                                                                                                                                                                                                                                                                                                                                                           |
| Secondary Subject Heading:      | Public health                                                                                                                                                                                                                                                                                                                                                                                                                                                                                                                                                                                                                                                                                                                                                                                                                                                                                                                                                                                 |
| Keywords:                       | second-hand smoke, Hypertension < CARDIOLOGY, blood pressure, KNHANES                                                                                                                                                                                                                                                                                                                                                                                                                                                                                                                                                                                                                                                                                                                                                                                                                                                                                                                         |
|                                 |                                                                                                                                                                                                                                                                                                                                                                                                                                                                                                                                                                                                                                                                                                                                                                                                                                                                                                                                                                                               |

SCHOLARONE™  
Manuscripts

1  
2  
3  
4  
5 **The association between second-hand smoke exposure and**  
6  
7 **hypertension in never smokers: a cross sectional survey using data**  
8  
9 **from Korean National Health and Nutritional Examination Survey V,**  
10  
11 **2010-2012**  
12  
13  
14  
15

16  
17 Young Sik Park,<sup>1</sup> Chang-Hoon Lee,<sup>1</sup> Yu-Il Kim,<sup>2</sup> Chul Min Ahn,<sup>3</sup> Ju Ock Kim,<sup>4</sup> Ju-  
18  
19 Heon Park,<sup>5</sup> Sang Haak Lee,<sup>6</sup> Jae Yeol Kim,<sup>7</sup> Eun Mi Chun,<sup>8</sup> Tae-Hoon Jung,<sup>9</sup> Kwang-  
20  
21 Ha Yoo<sup>10</sup>  
22  
23  
24

25  
26 <sup>1</sup> Department of Internal Medicine, Seoul National University College of Medicine,  
27  
28 Seoul, Korea  
29

30 <sup>2</sup>Department of Internal Medicine, Chonnam National University Hospital, Gwangju  
31  
32 Korea  
33

34 <sup>3</sup>Department of Internal Medicine, Yonsei University College of Medicine, Seoul,  
35  
36 Korea  
37

38 <sup>4</sup>Department of Internal Medicine, Chungnam National University School of Medicine,  
39  
40 Daejeon, Korea  
41  
42

43 <sup>5</sup>Department of Internal Medicine, Ajou University School of Medicine, Suwon, Korea  
44

45 <sup>6</sup>Department of Internal Medicine, The Catholic University of Korea, College of  
46  
47 Medicine, Seoul, Korea  
48

49 <sup>7</sup>Department of Internal Medicine, Chung-Ang University College of Medicine, Seoul,  
50  
51 Korea  
52  
53  
54  
55  
56  
57



1  
2  
3  
4  
5 <sup>8</sup>Department of Internal Medicine, Ewha Womans University School of Medicine,  
6  
7 Seoul, Korea

8  
9 <sup>9</sup>Department of Internal Medicine, Chilgok Kyungpook National University School of  
10  
11 Medicine, Daegu, Korea

12  
13 <sup>10</sup>Department of Internal Medicine, Konkuk University College of Medicine, Seoul,  
14  
15 Korea

16  
17  
18  
19  
20 **Corresponding author:** Chang-Hoon Lee, MD, PhD

21  
22 Associate professor, Division of Pulmonary and Critical Care Medicine, Department of  
23  
24 Internal Medicine, Seoul National University College of Medicine, Seoul National  
25  
26 University Hospital, 101 Daehak-Ro Jongno-Gu, Seoul, 03080, Republic of Korea Tel:  
27  
28 +82-2-2072-4743 Fax: +82-2-762-9662

29  
30 E-mail: kauri670@empal.com

31  
32  
33  
34  
35 **Running title:** second-hand smoking exposure and hypertension

## Abstract

**Objectives:** Second-hand smoke (SHS) exposure is associated with cardiovascular disease. This study aims to determine the association between SHS exposure estimated by questionnaire and hypertension in Korean never smokers.

**Setting:** Korean National Health and Nutrition Examination Survey (KNHANES) V was conducted from 2010 to 2012.

**Participants:** We selected the never smokers aged over 20 years who answered the question about the SHS exposure.

**Primary and secondary measures:** SHS exposure in both the home and work place was estimated using a self-reporting questionnaire. We investigated the association between SHS exposure and hypertension by using multivariate analysis. And we evaluated the mean systolic and diastolic blood pressure values according to SHS exposure after adjusting for possible confounding factors. All analyzes were carried out by female and male, separately.

**Results:** There were 10,532 (female 8,987 and male 1,545) never smokers. We divided the subjects into three groups according to the amount of SHS exposure: none—group I, <2hr/day—group II, and  $\geq$ 2hr/day—group III. Using multivariate analysis, hypertension was more commonly associated with group III than group I in female (adjusted OR=1.50, 95% CI: 1.00–2.04,  $P=0.011$ ). Adjusted mean systolic and diastolic blood pressure values in female who was not taking antihypertensive medication were significantly elevated in group III by 2.3 and 1.7 mmHg respectively.

**Conclusion:** SHS exposure is significantly associated with hypertension in female never smokers.

1  
2  
3  
4  
5 Keywords: second-hand smoke, hypertension, blood pressure, KNHANES  
6  
7  
8  
9  
10  
11

## 12 **Strengths and limitations of this study**

- 13
- 14
- 15 ➤ This study demonstrated hypertension is more common in female never smokers
- 16 with higher daily second-hand smoke (SHS) exposure and measure the differences
- 17 of systolic and diastolic blood pressure means by different SHS exposure groups
- 18
- 19
- 20
- 21 ➤ This study included the largest population (10,532) used to examine SHS exposure
- 22 based on a well-structured nationwide survey.
- 23
- 24
- 25
- 26 ➤ Survey design analysis was applied to reduce the possibility of biased estimates.
- 27
- 28 ➤ This cross-sectional analysis could not conclude the causal relationship between
- 29 SHS exposure and hypertension.
- 30
- 31
- 32
- 33
- 34
- 35
- 36
- 37
- 38
- 39
- 40
- 41
- 42
- 43
- 44
- 45
- 46
- 47
- 48
- 49
- 50
- 51
- 52
- 53
- 54
- 55
- 56
- 57
- 58
- 59
- 60

## INTRODUCTION

With a global prevalence of 26.4%,<sup>1</sup> hypertension is a large contributor to the burden of disease in adults. Well-known risk factor of hypertension is family history, but it is non-modifiable. Active cigarette smoking is another risk factor,<sup>2</sup> and it is totally preventable.<sup>3</sup>

Active smoking causes detrimental effects on smokers themselves, but second-hand smoke (SHS) exposure can also harm innocent bystanders. About 85% of SHS exposure results from sidestream smoke, which rises from the tip of a burning cigarette.<sup>4</sup> Sidestream smoke is potentially more harmful because it is not filtered. In recent years, the public has paid more attention to the harmful effect of SHS exposure on cardiovascular diseases<sup>5</sup> and supportive evidence is accumulating.<sup>6-8</sup> Although the positive relationship between SHS exposure and hypertension has been reported, some studies did not confirm this relationship.<sup>9</sup> In Korea, the adult smoking rate was 24.1% in 2013, and there was a big difference between sexes, 42.1% in men and 6.2% in women. In terms of the prevalence, women are more vulnerable to SHS exposure. The aim of this study was to elucidate the association between SHS exposure and hypertension in Korean never smokers using national survey data.

## MATERIALS AND METHODS

### Study population

1  
2  
3  
4  
5 The detailed data obtained from the fifth Korean National Health and Nutrition  
6 Examination Survey (KNHANES) V 2010-2012 are described elsewhere.<sup>10</sup> KNHANES  
7 is an annual collection of data from the Korean Statistical Office census of 3,800  
8 households from 576 randomly selected survey areas with the number selected from  
9 each area proportional to its size. Trained interviewers administer questionnaires on  
10 various health-related information, and subjects self-report their alcohol and smoking  
11 habits. KNHANES uses a complex, multi-stage probability sample design. The sample  
12 represents the total non-institutionalized civilian population of Korea. These data are  
13 available on the internet (<https://knhanes.cdc.go.kr>). Adult never smokers >20 years old  
14 with second hand smoking history available were included. Never smoker was defined  
15 when the total amount of smoking was <100 cigarettes during the lifetime. If histories  
16 of smoking or SHS exposure were not available, the cases were excluded. The  
17 institutional review board of Seoul National University Hospital waived the need for  
18 written informed consent from the participants (IRB no: H1509-011-699).

### 37 **Definition of SHS exposure**

38 Daily SHS exposure time was estimated both in the workplace and home. Total SHS  
39 exposure was calculated by the summation of both values. The total amount of SHS  
40 exposure was categorized into three groups according to exposure time; none (group I),  
41 <2hr/day (group II), and  $\geq$ 2hr/day (group III).

### 50 **Definition of hypertension**

51 Hypertension was defined if one or more of the criteria below were met. 1) diagnosed  
52 by physician, 2) using anti-hypertensive medications, 3) systolic blood pressure (BP)

1  
2  
3  
4  
5  $\geq 140$  mmHg, 4) diastolic BP  $\geq 90$  mmHg. The measurement of BP has been described  
6  
7 elsewhere.<sup>11</sup> In brief, after at least 5 minutes rest in a seating position, BP was manually  
8  
9 measured 3 times at 30-second intervals. Finally, the average of the 2<sup>nd</sup> and 3<sup>rd</sup>  
10  
11 measurements were used.  
12

### 13 14 15 16 **Statistical analysis**

17  
18 Weighted analysis was used for the KNHANES V data.  $\chi^2$  test was used for categorical  
19  
20 variables and *t*-test was used for continuous variables in univariate analysis.<sup>12</sup>  
21  
22 Multivariable logistic regression with survey weight analysis was conducted to evaluate  
23  
24 the association between SHS and hypertension. In model 1, the only co-variable was  
25  
26 age, while in model 2, multiple covariates such as age, height, weight, waist  
27  
28 circumference, serum triglyceride, fasting glucose, education, occupation, alcohol  
29  
30 intake, and marital status were included and adjusted for. In addition, we compared SBP  
31  
32 and DBP means between groups, again adjusting for covariates. This analysis was  
33  
34 limited to participants who were not taking antihypertensive medications. *P*-value  $< 0.05$   
35  
36 was considered significant. We used the STATA software version 13.1 (StataCorp,  
37  
38 College Station, Texas, US) for statistical analysis.  
39  
40  
41  
42  
43

### 44 **Patient and Public Involvement**

45  
46 The KNHANES V data were released after anonymization. The study population were  
47  
48 not involved in the design of this study.  
49  
50  
51  
52  
53

## 54 **RESULTS**

### **Baseline characteristics of participants**

The KNHANES V data include 25,534 participants. Among them, we found 19,259 adults (age >20 years old). After excluding 1,699 participants with unknown smoking history, 6,791 ever-smokers, and 236 with unknown SHS exposure, a total of 10,532 (female 8,987 and male 1,545) never smokers were available for analysis (Figure 1). Their mean age was  $47.7 \pm 0.3$  years in female and  $39.9 \pm 0.5$  years in male. The majority of the study population was light drinkers (<1/week), and socioeconomic status was evenly distributed by SHS exposure groups (Table 1). The percentages of participants categorized into group I, II, and III according to the degree of their SHS exposures were 68.1%, 24.2%, 7.7% in female and 53.3%, 39.4%, 7.2% in male. The participants in group I were older than those in the two other groups. The percentages of hypertension in group I, II, and III were 29.3%, 19.3%, 25.9% in female and 25.2%, 22.0%, 30.6% in male. BP, education level, alcohol intake were significantly different between the three SHS exposure groups.

### **Hypertension is associated with SHS exposure measured by questionnaire in female never smokers**

In female group, hypertension was significantly associated with SHS exposure (group III) after adjustment for age (model 1, adjusted OR=1.49, 95% CI: 1.14–1.93,  $P=0.003$ ) and even after adjustment for age, height, weight, waist circumference, serum triglyceride, fasting glucose, education, occupation, alcohol intake, and marital status (model 2, adjusted OR=1.50, 95% CI: 1.10–2.04,  $P=0.011$ , Table 2). But these differences were not observed in male group.

### **Systolic and diastolic blood pressure is increasing according to SHS exposure**

The mean systolic and diastolic BP increased proportional to the increasing SHS exposure in female group. On average, the differences between group III and group I were 2.3 mmHg and 1.7 mmHg in systolic and diastolic BP, respectively ( $P=0.030$  and  $P=0.011$ ) (Figure 2). In male group, we observed the increased tendency of the mean systolic and diastolic BP.

### **DISCUSSION**

This study demonstrated the association between SHS exposure measured by self-reported questionnaire in female never smokers and hypertension, using a well-designed nationwide survey.<sup>13</sup> Our findings strengthen the evidence of the harmful effect of chronic SHS exposure on hypertension. Additionally, we calculated the difference in mean systolic and diastolic BP between female group I and III by 2.3 and 1.7 mmHg, respectively. According to a previous study, a 3mmHg systolic BP difference was observed with a 10 kg increase in body weight.<sup>14</sup> Compared to this 3 mmHg systolic BP change accomplished by weight reduction, the value of 2.3 mmHg associated with SHS exposure is significant.

The association between hypertension and SHS exposure was observed only in female group. We postulated three possibilities. First, male never smokers were younger than female who never smoked ( $39.9\pm 0.5$  vs.  $47.7\pm 0.3$ ). The influence of smoking exposure on BP could be limited in younger man.<sup>15</sup> Second, smoking exposure could influence



1  
2  
3  
4  
5 cardiovascular disease due to sex-dependent biologic effect.<sup>16</sup> Third, the low statistical  
6  
7 power due to small sample size could affect results. In our dataset, the proportion of  
8  
9 male never smokers was only 19.4% of total male population aged over 20 years.  
10  
11 Although we did not achieve statistically significant results in male group, the changing  
12  
13 pattern of systolic and diastolic BP was same, and it could support the biologic effect  
14  
15 between SHS exposure and BP.  
16  
17

18  
19  
20 Pharmacologically, nicotine stimulates the sympathetic nervous system in active  
21  
22 smokers.<sup>17 18</sup> Epinephrine and norepinephrine are released by nicotine stimulation, and  
23  
24 these catecholamines increase myocardial contractility and promote vasoconstriction,  
25  
26 which results in increases in BP.<sup>19</sup> The association between smoking and hypertension  
27  
28 has also been observed in a mouse model,<sup>20</sup> and in epidemiologic studies.<sup>2</sup> Moreover,  
29  
30 the amount of smoking was positively correlated with hypertension<sup>21</sup> and carotid artery  
31  
32 atherosclerosis severity.<sup>22</sup> The biologic effect of SHS exposure on BP could be  
33  
34 extrapolated from the effects of active smoking. Serum nicotine level was increased  
35  
36 after SHS exposure in healthy nonsmokers.<sup>23</sup> In the context of active smoking exposure,  
37  
38 the duration or amount of SHS exposure is also important in the evaluation of the  
39  
40 chronic effect of passive smoking. Although the experimental studies of short-term SHS  
41  
42 exposure did not demonstrate a change in BP.<sup>23 24</sup> population-based studies have shown  
43  
44 that the habitual SHS exposure is associated with hypertension.<sup>6 7</sup>  
45  
46  
47  
48  
49

50  
51 Theoretically, SHS exposure can be determined by direct measurements of smoke  
52  
53 components in the air, self-reported questionnaires, or by measurements of biomarkers  
54  
55 from body fluid, such as serum, urine or saliva.<sup>25</sup> The correlation between self-reported  
56  
57  
58  
59  
60

1  
2  
3  
4  
5 questionnaire and biochemical assessment has been generally accurate in prior meta-  
6  
7 analysis.<sup>26</sup> The association between hypertension and SHS exposure was demonstrated  
8  
9 by using serum cotinine in the previous study<sup>6</sup> and self-reported questionnaire in our  
10  
11 study. Compared to biomarkers, self-reported questionnaires are inexpensive and  
12  
13 provide information on long-term exposure.  
14  
15

16  
17  
18 To our knowledge, this study included the largest population used to examine SHS  
19  
20 exposure based on a well-structured nationwide survey (KNHANES V),<sup>13</sup> and a survey  
21  
22 design analysis was applied to reduce the possibility of biased estimates.<sup>12</sup> In addition,  
23  
24 we included various potential confounding factors, including age, height, weight, waist  
25  
26 circumference, serum triglyceride, fasting glucose, education, occupation, alcohol  
27  
28 intake and marital status in the statistical model to clarify the conclusion. However there  
29  
30 were some limitations. First, our cross-sectional analysis could not conclude the causal  
31  
32 relationship between SHS exposure and hypertension. For example, in some cases,  
33  
34 hypertension may have been present before exposure to SHS. Second, information on  
35  
36 the smoke concentration and the environment where SHS exposure occurred was not  
37  
38 available. Third, we could not exclude hidden smokers. The proportion of cotinine-  
39  
40 verified active smokers was previously noted to be larger than that of self-reported  
41  
42 smokers.<sup>27</sup> In our dataset (KNHANES V), urine cotinine level was available in 19% of  
43  
44 female never smokers. In that group, 2.7% female never smokers had a urine cotinine  
45  
46 level >200 ng/mL, the cutoff value defining an active smoker.<sup>25</sup> Thus, the possibility of  
47  
48 active smoker contamination does exist. Forth, there could be concerns that factors  
49  
50 related with hypertension were not sufficiently investigated. For example, estrogen  
51  
52 increases the susceptibility to hypertension.<sup>28</sup> Because estrogen tends to rise in  
53  
54  
55  
56  
57  
58  
59  
60

1  
2  
3  
4  
5 perimenopausal period, perimenopausal women hence are likely to become  
6  
7 hypertensive. Although our survey did not measure the estrogen level, the analysis in  
8  
9 which perimenopausal participants were excluded also shows the significant  
10  
11 relationship between SHS exposure and hypertension (data not shown). A family  
12  
13 history of hypertension could also contribute on the development of hypertension. We  
14  
15 did not exclude participants who had a family history of hypertension. However, even  
16  
17 when participants with a self-reported family history of hypertension were excluded, the  
18  
19 significant relationship between SHS exposure and hypertension was also observed  
20  
21 (data not shown).  
22  
23  
24  
25

26  
27 In conclusion, on using self-reported questionnaires, we found that SHS exposure was  
28  
29 significantly associated with hypertension in Korean female never smokers. Both  
30  
31 systolic and diastolic blood pressures were significantly elevated in the SHS exposed  
32  
33 population.  
34  
35  
36  
37  
38  
39  
40  
41  
42  
43  
44  
45  
46  
47  
48  
49  
50  
51  
52  
53  
54  
55  
56  
57

1  
2  
3  
4  
5 **Funding:** This research received no specific grant from any funding agency in the  
6 public, commercial or not-for-profit sectors.  
7  
8  
9

10  
11 **Competing interests:** None declared.  
12  
13

### 14 **Author Contributions**

15  
16 Conceptualization: YSP, CHL

17  
18 Data curation: YSP, CHL, YIL

19  
20 Methodology: YSP, CHL, KHY

21  
22 Project administration: CHL

23  
24 Original draft: YSP, CHL

25  
26 Review & editing: YSP, CHL, YIL, CMA, JOK, JHP, SHL, JYK, EMC, THJ, KHY  
27  
28  
29  
30  
31  
32

33 **Patient consent:** Waived from IRB  
34  
35  
36

37 **Ethics approval:** Seoul National University Hospital IRB  
38  
39  
40  
41

42 **Data sharing statement:** The original data came from Korean National Health and  
43 Nutritional Examination Survey (<https://knhanes.cdc.go.kr/knhanes/eng/index.do>). All  
44 the data presented this manuscript are available from the corresponding author at  
45 [kauri670@empal.com](mailto:kauri670@empal.com).  
46  
47  
48  
49  
50  
51

52 **Open Access:** This is an Open Access article distributed in accordance with the  
53 Creative Commons Attribution Non Commercial (CC BY-NC 4.0) license, which  
54  
55  
56  
57

1  
2  
3  
4  
5 permits others to distribute, remix, adapt, build upon this work non-commercially, and  
6  
7 license their derivative works on different terms, provided the original work is properly  
8  
9 cited and the use is non-commercial. See: [http://creativecommons.org/licenses/by-](http://creativecommons.org/licenses/by-nc/4.0/)  
10  
11 [nc/4.0/](http://creativecommons.org/licenses/by-nc/4.0/)  
12  
13  
14  
15  
16  
17  
18  
19  
20  
21  
22  
23  
24  
25  
26  
27  
28  
29  
30  
31  
32  
33  
34  
35  
36  
37  
38  
39  
40  
41  
42  
43  
44  
45  
46  
47  
48  
49  
50  
51  
52  
53  
54  
55  
56  
57  
58  
59  
60

For peer review only

**REFERENCES**

1. Bromfield S, Muntner P. High blood pressure: the leading global burden of disease risk factor and the need for worldwide prevention programs. *Curr Hypertens Rep* 2013;15:134-6.
2. Bowman TS, Gaziano JM, Buring JE, *et al*. A prospective study of cigarette smoking and risk of incident hypertension in women. *J Am Coll Cardiol* 2007;50:2085-92.
3. World Health Organization, World Heart Federation, World Stroke Organization. Global atlas on cardiovascular disease prevention and control. [http://www.who.int/cardiovascular\\_diseases/publications/atlas\\_cvd/en/](http://www.who.int/cardiovascular_diseases/publications/atlas_cvd/en/) Accessed Nov 27, 2017
4. Centers for Disease C. 1986 Surgeon General's report: the health consequences of involuntary smoking. *MMWR Morb Mortal Wkly Rep* 1986;35:769-70.
5. Jacobs M, Alonso AM, Sherin KM, *et al*. Policies to restrict secondhand smoke exposure: American College of Preventive Medicine Position Statement. *Am J Prev Med* 2013;45:360-7.
6. Alshaarawy O, Xiao J, Shankar A. Association of serum cotinine levels and hypertension in never smokers. *Hypertension* 2013;61:304-8.
7. Makris TK, Thomopoulos C, Papadopoulos DP, *et al*. Association of passive smoking with masked hypertension in clinically normotensive nonsmokers. *Am J Hypertens* 2009;22:853-9.
8. Li N, Li Z, Chen S, *et al*. Effects of passive smoking on hypertension in rural Chinese nonsmoking women. *J Hypertens* 2015;33:2210-4.

- 1  
2  
3  
4  
5 9. Xie B, Palmer PH, Pang Z, *et al*. Environmental tobacco use and indicators of  
6  
7 metabolic syndrome in Chinese adults. *Nicotine Tob Res* 2010;12:198-206.  
8  
9 10. Kweon S, Kim Y, Jang MJ, *et al*. Data resource profile: the Korea National Health  
10  
11 and Nutrition Examination Survey (KNHANES). *Int J Epidemiol* 2014;43:69-  
12  
13 77.  
14  
15 11. Lee HT, Shin J, Min SY, *et al*. The relationship between bone mineral density  
16  
17 and blood pressure in the Korean elderly population: the Korea National  
18  
19 Health and Nutrition Examination Survey, 2008-2011. *Clin Exp Hypertens*  
20  
21 2015;37:212-7.  
22  
23 12. Kim Y, Park S, Kim NS, *et al*. Inappropriate survey design analysis of the Korean  
24  
25 National Health and Nutrition Examination Survey may produce biased  
26  
27 results. *J Prev Med Public Health* 2013;46:96-104.  
28  
29 13. Kim Y. The Korea National Health and Nutrition Examination Survey  
30  
31 (KNHANES): current status and challenges. *Epidemiol Health*  
32  
33 2014;36:e2014002.  
34  
35 14. Poirier P, Giles TD, Bray GA, *et al*. Obesity and cardiovascular disease:  
36  
37 pathophysiology, evaluation, and effect of weight loss: an update of the  
38  
39 1997 American Heart Association Scientific Statement on Obesity and Heart  
40  
41 Disease from the Obesity Committee of the Council on Nutrition, Physical  
42  
43 Activity, and Metabolism. *Circulation* 2006;113:898-918.  
44  
45 15. Primatesta P, Falaschetti E, Gupta S, *et al*. Association between smoking and  
46  
47 blood pressure: evidence from the health survey for England. *Hypertension*  
48  
49 2001;37:187-93.  
50  
51  
52  
53  
54  
55  
56  
57  
58  
59  
60

- 1  
2  
3  
4  
5 16. Zhang M, An Q, Yeh F, *et al.* Smoking-attributable mortality in American Indians:  
6 findings from the Strong Heart Study. *Eur J Epidemiol* 2015;30:553-61.  
7  
8  
9 17. Grassi G, Seravalle G, Calhoun DA, *et al.* Mechanisms responsible for  
10 sympathetic activation by cigarette smoking in humans. *Circulation*  
11  
12 1994;90:248-53.  
13  
14  
15 18. Karakaya O, Barutcu I, Kaya D, *et al.* Acute effect of cigarette smoking on heart  
16 rate variability. *Angiology* 2007;58:620-4.  
17  
18  
19 19. Benowitz NL. Cigarette smoking and cardiovascular disease: pathophysiology  
20 and implications for treatment. *Prog Cardiovasc Dis* 2003;46:91-111.  
21  
22  
23 20. Talukder MA, Johnson WM, Varadharaj S, *et al.* Chronic cigarette smoking  
24 causes hypertension, increased oxidative stress, impaired NO bioavailability,  
25 endothelial dysfunction, and cardiac remodeling in mice. *Am J Physiol Heart*  
26  
27 *Circ Physiol* 2011;300:H388-96.  
28  
29  
30 21. Thuy AB, Blizzard L, Schmidt MD, *et al.* The association between smoking and  
31 hypertension in a population-based sample of Vietnamese men. *J Hypertens*  
32  
33 2010;28:245-50.  
34  
35  
36 22. Tell GS, Polak JF, Ward BJ, *et al.* Relation of smoking with carotid artery wall  
37 thickness and stenosis in older adults. The Cardiovascular Health Study.  
38  
39 The Cardiovascular Health Study (CHS) Collaborative Research Group.  
40  
41 *Circulation* 1994;90:2905-8.  
42  
43  
44 23. Argacha JF, Adamopoulos D, Gujic M, *et al.* Acute effects of passive smoking on  
45 peripheral vascular function. *Hypertension* 2008;51:1506-11.  
46  
47  
48  
49  
50  
51  
52  
53  
54  
55  
56  
57  
58  
59  
60



- 1  
2  
3  
4  
5 24. Hausberg M, Mark AL, Winniford MD, *et al.* Sympathetic and vascular effects of  
6  
7 short-term passive smoke exposure in healthy nonsmokers. *Circulation*  
8  
9 1997;96:282-7.  
10  
11 25. Florescu A, Ferrence R, Einarson T, *et al.* Methods for quantification of  
12  
13 exposure to cigarette smoking and environmental tobacco smoke: focus on  
14  
15 developmental toxicology. *Ther Drug Monit* 2009;31:14-30.  
16  
17 26. Patrick DL, Cheadle A, Thompson DC, *et al.* The validity of self-reported  
18  
19 smoking: a review and meta-analysis. *Am J Public Health* 1994;84:1086-93.  
20  
21 27. Jung-Choi KH, Khang YH, Cho HJ. Hidden female smokers in Asia: a comparison  
22  
23 of self-reported with cotinine-verified smoking prevalence rates in  
24  
25 representative national data from an Asian population. *Tob Control*  
26  
27 2012;21:536-42.  
28  
29 28. Subramanian M, Balasubramanian P, Garver H, *et al.* Chronic estradiol-17beta  
30  
31 exposure increases superoxide production in the rostral ventrolateral  
32  
33 medulla and causes hypertension: reversal by resveratrol. *Am J Physiol*  
34  
35 *Regul Integr Comp Physiol* 2011;300:R1560-8.  
36  
37  
38  
39  
40  
41  
42  
43  
44  
45  
46  
47  
48  
49  
50  
51  
52  
53  
54  
55  
56  
57  
58  
59  
60

**Table 1. Baseline characteristics according to the degree of second-hand smoke exposure.**

| Variables                   | Female                     |           |           | P value | Male                       |           |           | P value |
|-----------------------------|----------------------------|-----------|-----------|---------|----------------------------|-----------|-----------|---------|
|                             | Second-hand smoke exposure |           |           |         | Second-hand smoke exposure |           |           |         |
|                             | None                       | <2hr/day  | ≥2hr/day  |         | None                       | <2hr/day  | ≥2hr/day  |         |
| % of total                  | 68.1                       | 24.2      | 7.7       |         | 53.3                       | 39.4      | 7.2       |         |
| Age (years)                 | 49.6±0.3                   | 42.9±0.4  | 45.2±0.6  | <0.001* | 41.7±0.7                   | 37.4±0.6  | 40.2±1.4  | <0.001* |
| Weight (kg)                 | 57.5±0.2                   | 57.5±0.3  | 59.2±0.5  | <0.001* | 70.1±0.5                   | 71.4±0.6  | 72.7±1.4  | 0.032*  |
| Height (cm)                 | 156.6±0.1                  | 157.9±0.2 | 157.8±0.3 | <0.001* | 171.4±0.3                  | 172.2±0.3 | 170.6±0.8 | 0.783   |
| Waist Circumference (cm)    | 78.7±0.2                   | 76.9±0.3  | 78.9±0.5  | 0.009*  | 82.9±0.4                   | 83.0±0.5  | 84.8±1.1  | 0.231   |
| BMI (kg/m <sup>2</sup> )    | 23.5±0.1                   | 23.1±0.1  | 23.8±0.2  | 0.536   | 23.8±0.1                   | 24.1±0.2  | 24.9±0.4  | 0.021*  |
| Blood pressure (mmHg)       |                            |           |           |         |                            |           |           |         |
| Systole                     | 117.5±0.3                  | 113.5±0.5 | 117.7±0.9 | <0.001* | 119.3±0.6                  | 118.9±0.6 | 120.8±1.7 | 0.740   |
| Diastole                    | 74.0±0.2                   | 73.6±0.3  | 75.7±0.5  | 0.082   | 77.9±0.4                   | 79.9±0.5  | 79.9±1.1  | 0.005*  |
| Total cholesterol (mg/dL)   | 190.4±0.7                  | 186.5±1.0 | 192.9±1.8 | 0.453   | 183.±1.6                   | 182.7±1.8 | 186.5±3.8 | 0.666   |
| HDL (mg/dL)                 | 55.2±0.3                   | 55.6±0.6  | 57.7±1.1  | 0.068   | 51.0±0.9                   | 50.3±1.2  | 50.4±2.5  | 0.583   |
| Triglyceride (mg/dL)        | 115.0±1.8                  | 104.7±1.9 | 112.2±4.4 | 0.016*  | 121.8±3.5                  | 129.6±4.7 | 121.4±7.2 | 0.339   |
| Fasting glucose (mg/dL)     | 95.9±0.4                   | 93.6±0.5  | 95.1±0.9  | 0.008*  | 96.6±0.9                   | 95.7±0.8  | 96.6±1.8  | 0.658   |
| Hypertension                | 29.3                       | 19.3      | 25.9      | <0.001* | 25.2                       | 22.0      | 30.6      | 0.197   |
| Diabetes mellitus           | 14.8                       | 9.8       | 10.0      | <0.001* | 10.0                       | 9.2       | 13.1      | 0.527   |
| Metabolic syndrome          | 25.6                       | 17.0      | 18.8      | <0.001* | 23.2                       | 20.2      | 12.9      | 0.325   |
| Alcohol intake              |                            |           |           | <0.001* |                            |           |           | <0.001* |
| Never drinker               | 21.7                       | 11.2      | 18.5      |         | 11.3                       | 7.3       | 7.4       |         |
| Former drinker              | 18.0                       | 13.9      | 16.5      |         | 13.5                       | 6.1       | 5.9       |         |
| Light drinker (≤1/week)     | 53.9                       | 66.8      | 57.3      |         | 56.7                       | 66.5      | 53.8      |         |
| Moderate drinker (2-3/week) | 5.1                        | 7.1       | 6.2       |         | 13.9                       | 16.5      | 22.4      |         |

|                                 |      |      |      |         |      |      |      |         |
|---------------------------------|------|------|------|---------|------|------|------|---------|
| Heavy drinker ( $\geq 4$ /week) | 1.3  | 1.0  | 1.5  |         | 4.7  | 3.6  | 10.5 |         |
| Marital status                  | 88.8 | 76.9 | 84.1 | <0.001* | 58.0 | 59.0 | 59.0 | 0.955   |
| Educational level               |      |      |      | <0.001* |      |      |      | <0.001* |
| Below middle school             | 30.4 | 18.2 | 26.8 |         | 9.9  | 2.9  | 7.7  |         |
| Middle school                   | 9.8  | 9.9  | 10.2 |         | 6.2  | 6.4  | 9.0  |         |
| High school                     | 29.8 | 39.9 | 33.1 |         | 43.0 | 40.3 | 47.6 |         |
| Above high school               | 30.1 | 31.9 | 30.0 |         | 40.9 | 50.5 | 35.8 |         |
| Socioeconomic status            |      |      |      | 0.144   |      |      |      | 0.116   |
| 1Q                              | 25.3 | 25.3 | 27.3 |         | 30.2 | 21.8 | 30.5 |         |
| 2Q                              | 26.8 | 25.7 | 21.2 |         | 21.2 | 24.4 | 20.0 |         |
| 3Q                              | 25.3 | 25.9 | 23.7 |         | 25.6 | 25.5 | 26.8 |         |
| 4Q                              | 22.6 | 23.1 | 27.9 |         | 23.0 | 28.3 | 22.7 |         |
| Occupation                      |      |      |      | <0.001* |      |      |      | <0.001* |
| Manager or professional         | 11.0 | 15.6 | 11.8 |         | 21.8 | 28.6 | 12.5 |         |
| Office worker                   | 5.0  | 14.3 | 13.3 |         | 7.6  | 15.5 | 15.6 |         |
| Service                         | 9.0  | 22.3 | 42.4 |         | 7.1  | 15.0 | 13.8 |         |
| Farmer worker or fisherman      | 6.0  | 5.6  | 5.0  |         | 7.6  | 6.2  | 1.3  |         |
| Technician                      | 2.3  | 4.8  | 4.2  |         | 9.1  | 21.5 | 39.5 |         |
| Labor worker                    | 8.0  | 12.8 | 11.6 |         | 5.3  | 5.8  | 9.2  |         |
| Unemployed (outside house)      | 58.8 | 24.7 | 17.4 |         | 41.6 | 7.6  | 8.2  |         |

The data were presented as mean $\pm$ standard error in continuous variables and % in categorical variables.

BMI, body mass index; SHS, second-hand smoke

\* $P < 0.05$

**Table 2. Association between second-hand smoke (SHS) exposure and hypertension.**

| For hypertension | Female               |             |         |                      |             |         | Male                 |           |         |                      |           |         |
|------------------|----------------------|-------------|---------|----------------------|-------------|---------|----------------------|-----------|---------|----------------------|-----------|---------|
|                  | Model 1 <sup>a</sup> |             |         | Model 2 <sup>b</sup> |             |         | Model 1 <sup>a</sup> |           |         | Model 2 <sup>b</sup> |           |         |
|                  | aOR                  | 95% CI      | P value | aOR                  | 95% CI      | P value | aOR                  | 95% CI    | P value | aOR                  | 95% CI    | P value |
| SHS exposure     |                      |             |         |                      |             |         |                      |           |         |                      |           |         |
| None             | 1                    |             |         | 1                    |             |         | 1                    |           |         | 1                    |           |         |
| < 2hr/day        | 1.06                 | 0.90 – 1.25 | 0.487   | 1.01                 | 0.91 – 1.33 | 0.314   | 1.07                 | 0.78-1.47 | 0.664   | 0.87                 | 0.60-1.25 | 0.435   |
| ≥ 2hr/day        | 1.49                 | 1.14 – 1.93 | 0.003** | 1.50                 | 1.10 – 2.04 | 0.011*  | 1.52                 | 0.89-2.61 | 0.128   | 0.93                 | 0.52-1.68 | 0.818   |

<sup>a</sup>Adjusted for age.

<sup>b</sup>Adjusted for age, height, weight, waist circumference, serum triglyceride, fasting glucose, education, occupation, alcohol intake, and marital status.

aOR, adjusted odds ratio; CI, confidence interval; SHS, second-hand smoke

\*P<0.05; \*\*P<0.01

1  
2  
3 17 Figure 1. Flow diagram of study population.  
4

5 18

6  
7 19 Figure 2. Adjusted means of systolic and diastolic blood pressure according to  
8  
9 20 second-hand smoke exposure in female (A and B) and male (C and D) population  
10  
11 21 without antihypertensive treatment. The mean values are adjusted for age, height,  
12  
13 22 weight, waist circumference, serum triglyceride, fasting glucose, education,  
14  
15 23 occupation, alcohol intake, and marital status.  
16  
17

18 24

19  
20 25  
21  
22  
23  
24  
25  
26  
27  
28  
29  
30  
31  
32  
33  
34  
35  
36  
37  
38  
39  
40  
41  
42  
43  
44  
45  
46  
47  
48  
49  
50  
51  
52  
53  
54  
55  
56  
57  
58  
59  
60

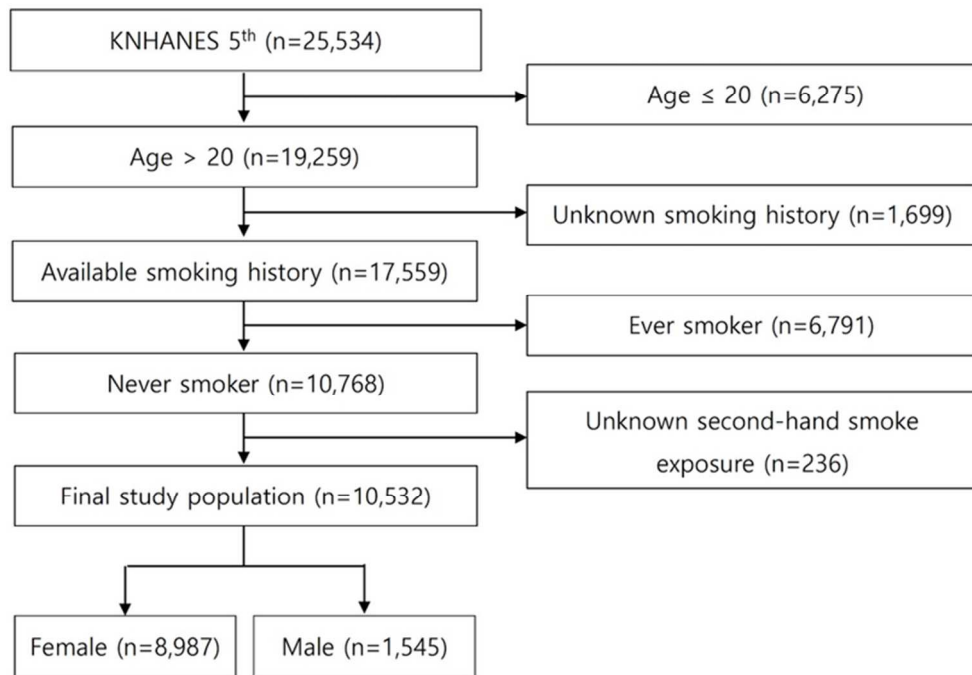

Figure 1. Flow diagram of study population.

70x49mm (300 x 300 DPI)

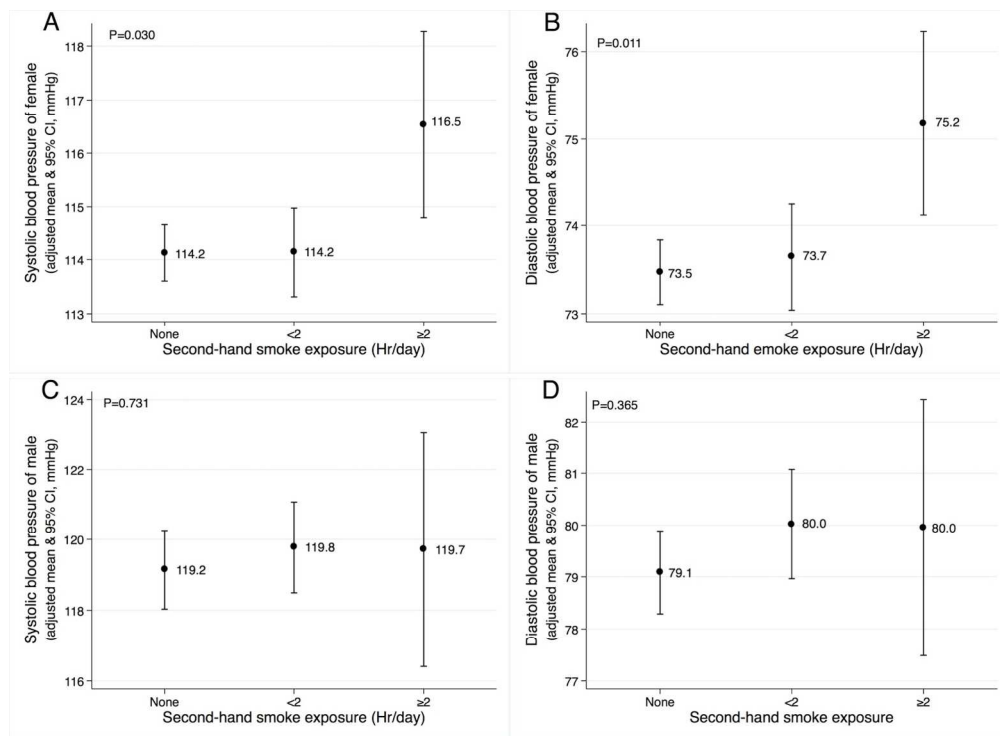

Figure 2. Adjusted means of systolic and diastolic blood pressure according to second-hand smoke exposure in female (A and B) and male (C and D) population without antihypertensive treatment. The mean values are adjusted for age, height, weight, waist circumference, serum triglyceride, fasting glucose, education, occupation, alcohol intake, and marital status.

219x160mm (300 x 300 DPI)

**STROBE 2007 (v4) checklist of items to be included in reports of observational studies in epidemiology\***  
**Checklist for cohort, case-control, and cross-sectional studies (combined)**

| Section/Topic             | Item # | Recommendation                                                                                                                                                                                                                                                                                                                                                                                                                                                         | Reported on page # |
|---------------------------|--------|------------------------------------------------------------------------------------------------------------------------------------------------------------------------------------------------------------------------------------------------------------------------------------------------------------------------------------------------------------------------------------------------------------------------------------------------------------------------|--------------------|
| Title and abstract        | 1      | (a) Indicate the study’s design with a commonly used term in the title or the abstract                                                                                                                                                                                                                                                                                                                                                                                 | 1                  |
|                           |        | (b) Provide in the abstract an informative and balanced summary of what was done and what was found                                                                                                                                                                                                                                                                                                                                                                    | 3                  |
| <b>Introduction</b>       |        |                                                                                                                                                                                                                                                                                                                                                                                                                                                                        |                    |
| Background/rationale      | 2      | Explain the scientific background and rationale for the investigation being reported                                                                                                                                                                                                                                                                                                                                                                                   | 5                  |
| Objectives                | 3      | State specific objectives, including any pre-specified hypotheses                                                                                                                                                                                                                                                                                                                                                                                                      | 5                  |
| <b>Methods</b>            |        |                                                                                                                                                                                                                                                                                                                                                                                                                                                                        |                    |
| Study design              | 4      | Present key elements of study design early in the paper                                                                                                                                                                                                                                                                                                                                                                                                                | 6                  |
| Setting                   | 5      | Describe the setting, locations, and relevant dates, including periods of recruitment, exposure, follow-up, and data collection                                                                                                                                                                                                                                                                                                                                        | 6                  |
| Participants              | 6      | (a) <i>Cohort study</i> —Give the eligibility criteria, and the sources and methods of selection of participants. Describe methods of follow-up<br><i>Case-control study</i> —Give the eligibility criteria, and the sources and methods of case ascertainment and control selection. Give the rationale for the choice of cases and controls<br><i>Cross-sectional study</i> —Give the eligibility criteria, and the sources and methods of selection of participants | 6                  |
|                           |        | (b) <i>Cohort study</i> —For matched studies, give matching criteria and number of exposed and unexposed<br><i>Case-control study</i> —For matched studies, give matching criteria and the number of controls per case                                                                                                                                                                                                                                                 | 6                  |
| Variables                 | 7      | Clearly define all outcomes, exposures, predictors, potential confounders, and effect modifiers. Give diagnostic criteria, if applicable                                                                                                                                                                                                                                                                                                                               | 6                  |
| Data sources/ measurement | 8*     | For each variable of interest, give sources of data and details of methods of assessment (measurement). Describe comparability of assessment methods if there is more than one group                                                                                                                                                                                                                                                                                   | 6                  |
| Bias                      | 9      | Describe any efforts to address potential sources of bias                                                                                                                                                                                                                                                                                                                                                                                                              | 5-6                |
| Study size                | 10     | Explain how the study size was arrived at                                                                                                                                                                                                                                                                                                                                                                                                                              | 6                  |
| Quantitative variables    | 11     | Explain how quantitative variables were handled in the analyses. If applicable, describe which groupings were chosen and why                                                                                                                                                                                                                                                                                                                                           | 6                  |
| Statistical methods       | 12     | (a) Describe all statistical methods, including those used to control for confounding                                                                                                                                                                                                                                                                                                                                                                                  | 7                  |
|                           |        | (b) Describe any methods used to examine subgroups and interactions                                                                                                                                                                                                                                                                                                                                                                                                    | NE                 |
|                           |        | (c) Explain how missing data were addressed                                                                                                                                                                                                                                                                                                                                                                                                                            | 6                  |
|                           |        | (d) <i>Cohort study</i> —If applicable, explain how loss to follow-up was addressed<br><i>Case-control study</i> —If applicable, explain how matching of cases and controls was addressed                                                                                                                                                                                                                                                                              | 6                  |



|                          |     |                                                                                                                                                                                                              |          |
|--------------------------|-----|--------------------------------------------------------------------------------------------------------------------------------------------------------------------------------------------------------------|----------|
|                          |     | <i>Cross-sectional study</i> —If applicable, describe analytical methods taking account of sampling strategy                                                                                                 |          |
|                          |     | (e) Describe any sensitivity analyses                                                                                                                                                                        | NE       |
| <b>Results</b>           |     |                                                                                                                                                                                                              |          |
| Participants             | 13* | (a) Report numbers of individuals at each stage of study—eg numbers potentially eligible, examined for eligibility, confirmed eligible, included in the study, completing follow-up, and analysed            | 6        |
|                          |     | (b) Give reasons for non-participation at each stage                                                                                                                                                         | 6        |
|                          |     | (c) Consider use of a flow diagram                                                                                                                                                                           | Figure 1 |
| Descriptive data         | 14* | (a) Give characteristics of study participants (eg demographic, clinical, social) and information on exposures and potential confounders                                                                     | 7-8      |
|                          |     | (b) Indicate number of participants with missing data for each variable of interest                                                                                                                          | 7-8      |
|                          |     | (c) <i>Cohort study</i> —Summarise follow-up time (eg, average and total amount)                                                                                                                             |          |
| Outcome data             | 15* | <i>Cohort study</i> —Report numbers of outcome events or summary measures over time                                                                                                                          |          |
|                          |     | <i>Case-control study</i> —Report numbers in each exposure category, or summary measures of exposure                                                                                                         |          |
|                          |     | <i>Cross-sectional study</i> —Report numbers of outcome events or summary measures                                                                                                                           | 8        |
| Main results             | 16  | (a) Give unadjusted estimates and, if applicable, confounder-adjusted estimates and their precision (eg, 95% confidence interval). Make clear which confounders were adjusted for and why they were included | 8        |
|                          |     | (b) Report category boundaries when continuous variables were categorized                                                                                                                                    | 8        |
|                          |     | (c) If relevant, consider translating estimates of relative risk into absolute risk for a meaningful time period                                                                                             | NE       |
| Other analyses           | 17  | Report other analyses done—eg analyses of subgroups and interactions, and sensitivity analyses                                                                                                               | NE       |
| <b>Discussion</b>        |     |                                                                                                                                                                                                              |          |
| Key results              | 18  | Summarise key results with reference to study objectives                                                                                                                                                     | 8        |
| Limitations              | 19  | Discuss limitations of the study, taking into account sources of potential bias or imprecision. Discuss both direction and magnitude of any potential bias                                                   | 10-11    |
| Interpretation           | 20  | Give a cautious overall interpretation of results considering objectives, limitations, multiplicity of analyses, results from similar studies, and other relevant evidence                                   | 10-11    |
| Generalisability         | 21  | Discuss the generalisability (external validity) of the study results                                                                                                                                        | NE       |
| <b>Other information</b> |     |                                                                                                                                                                                                              |          |
| Funding                  | 22  | Give the source of funding and the role of the funders for the present study and, if applicable, for the original study on which the present article is based                                                | NE       |

\*Give information separately for cases and controls in case-control studies and, if applicable, for exposed and unexposed groups in cohort and cross-sectional studies.

**Note:** An Explanation and Elaboration article discusses each checklist item and gives methodological background and published examples of transparent reporting. The STROBE checklist is best used in conjunction with this article (freely available on the Web sites of PLoS Medicine at <http://www.plosmedicine.org/>, Annals of Internal Medicine at <http://www.annals.org/>, and Epidemiology at <http://www.epidem.com/>). Information on the STROBE Initiative is available at [www.strobe-statement.org](http://www.strobe-statement.org).

# BMJ Open

## The association between second-hand smoke exposure and hypertension in never smokers: a cross sectional survey using data from Korean National Health and Nutritional Examination Survey V, 2010-2012

|                                 |                                                                                                                                                                                                                                                                                                                                                                                                                                                                                                                                                                                                                                                                                                                                                                                                                                                                                                                                                                                               |
|---------------------------------|-----------------------------------------------------------------------------------------------------------------------------------------------------------------------------------------------------------------------------------------------------------------------------------------------------------------------------------------------------------------------------------------------------------------------------------------------------------------------------------------------------------------------------------------------------------------------------------------------------------------------------------------------------------------------------------------------------------------------------------------------------------------------------------------------------------------------------------------------------------------------------------------------------------------------------------------------------------------------------------------------|
| Journal:                        | <i>BMJ Open</i>                                                                                                                                                                                                                                                                                                                                                                                                                                                                                                                                                                                                                                                                                                                                                                                                                                                                                                                                                                               |
| Manuscript ID                   | bmjopen-2017-021217.R2                                                                                                                                                                                                                                                                                                                                                                                                                                                                                                                                                                                                                                                                                                                                                                                                                                                                                                                                                                        |
| Article Type:                   | Research                                                                                                                                                                                                                                                                                                                                                                                                                                                                                                                                                                                                                                                                                                                                                                                                                                                                                                                                                                                      |
| Date Submitted by the Author:   | 31-Mar-2018                                                                                                                                                                                                                                                                                                                                                                                                                                                                                                                                                                                                                                                                                                                                                                                                                                                                                                                                                                                   |
| Complete List of Authors:       | Park, Young Sik; Seoul National University College of Medicine, Internal Medicine<br>Lee, Chang-Hoon; Seoul National University Hospital, Internal Medicine<br>Kim, Yu-Il; Chonnam National University Hospital, Internal Medicine<br>Ahn, Chul Min; Yonsei University College of Medicine, Internal Medicine<br>Kim, Ju Ock; Chungnam National University School of Medicine, Internal Medicine<br>Park, Ju-Heon; Ajou University School of Medicine and Graduate School of Medicine, Internal Medicine<br>Lee, Sang-Haak; Catholic University of Korea School of Medicine, Internal Medicine<br>Kim, Jae Yeol; Chung-Ang University College of Medicine and Graduate School of Medicine, Internal Medicine<br>Chun, Eun Mi; Ewha Women's University College of Medicine and Graduate School of Medicine, Internal Medicine<br>Jung, Tae-Hoon; Kyungpook National University School of Medicine, Internal Medicine<br>Yoo, Kwang-Ha; Konkuk University School of Medicine, Internal Medicine |
| <b>Primary Subject Heading</b>: | Smoking and tobacco                                                                                                                                                                                                                                                                                                                                                                                                                                                                                                                                                                                                                                                                                                                                                                                                                                                                                                                                                                           |
| Secondary Subject Heading:      | Public health                                                                                                                                                                                                                                                                                                                                                                                                                                                                                                                                                                                                                                                                                                                                                                                                                                                                                                                                                                                 |
| Keywords:                       | second-hand smoke, Hypertension < CARDIOLOGY, blood pressure, KNHANES                                                                                                                                                                                                                                                                                                                                                                                                                                                                                                                                                                                                                                                                                                                                                                                                                                                                                                                         |
|                                 |                                                                                                                                                                                                                                                                                                                                                                                                                                                                                                                                                                                                                                                                                                                                                                                                                                                                                                                                                                                               |

SCHOLARONE™  
Manuscripts

1  
2  
3  
4  
5 **The association between second-hand smoke exposure and**  
6  
7 **hypertension in never smokers: a cross sectional survey using data**  
8  
9 **from Korean National Health and Nutritional Examination Survey V,**  
10  
11 **2010-2012**  
12  
13  
14  
15

16  
17 Young Sik Park,<sup>1</sup> Chang-Hoon Lee,<sup>1</sup> Yu-Il Kim,<sup>2</sup> Chul Min Ahn,<sup>3</sup> Ju Ock Kim,<sup>4</sup> Ju-  
18  
19 Heon Park,<sup>5</sup> Sang Haak Lee,<sup>6</sup> Jae Yeol Kim,<sup>7</sup> Eun Mi Chun,<sup>8</sup> Tae-Hoon Jung,<sup>9</sup> Kwang-  
20  
21 Ha Yoo<sup>10</sup>  
22  
23  
24

25  
26 <sup>1</sup> Department of Internal Medicine, Seoul National University College of Medicine,  
27  
28 Seoul, Korea  
29

30 <sup>2</sup>Department of Internal Medicine, Chonnam National University Hospital, Gwangju  
31  
32 Korea  
33

34 <sup>3</sup>Department of Internal Medicine, Yonsei University College of Medicine, Seoul,  
35  
36 Korea  
37

38 <sup>4</sup>Department of Internal Medicine, Chungnam National University School of Medicine,  
39  
40 Daejeon, Korea  
41  
42

43 <sup>5</sup>Department of Internal Medicine, Ajou University School of Medicine, Suwon, Korea  
44

45 <sup>6</sup>Department of Internal Medicine, The Catholic University of Korea, College of  
46  
47 Medicine, Seoul, Korea  
48

49 <sup>7</sup>Department of Internal Medicine, Chung-Ang University College of Medicine, Seoul,  
50  
51 Korea  
52  
53  
54  
55  
56  
57

1  
2  
3  
4  
5 <sup>8</sup>Department of Internal Medicine, Ewha Womans University School of Medicine,  
6  
7 Seoul, Korea

8  
9 <sup>9</sup>Department of Internal Medicine, Chilgok Kyungpook National University School of  
10  
11 Medicine, Daegu, Korea

12  
13 <sup>10</sup>Department of Internal Medicine, Konkuk University College of Medicine, Seoul,  
14  
15 Korea

16  
17  
18  
19  
20 **Corresponding author:** Chang-Hoon Lee, MD, PhD

21  
22 Associate professor, Division of Pulmonary and Critical Care Medicine, Department of  
23  
24 Internal Medicine, Seoul National University College of Medicine, Seoul National  
25  
26 University Hospital, 101 Daehak-Ro Jongno-Gu, Seoul, 03080, Republic of Korea Tel:  
27  
28 +82-2-2072-4743 Fax: +82-2-762-9662

29  
30 E-mail: kauri670@empal.com

31  
32  
33  
34  
35 **Running title:** second-hand smoking exposure and hypertension

## Abstract

**Objectives:** Second-hand smoke (SHS) exposure is associated with cardiovascular disease. This study aims to determine the association between SHS exposure estimated by questionnaire and hypertension in Korean never smokers.

**Setting:** Korean National Health and Nutrition Examination Survey (KNHANES) V was conducted from 2010 to 2012.

**Participants:** We selected the never smokers aged over 20 years who answered the question about the SHS exposure.

**Primary and secondary measures:** SHS exposure in both the home and work place was estimated using a self-reporting questionnaire. We investigated the association between SHS exposure and hypertension by using multivariate analysis. And we evaluated the mean systolic and diastolic blood pressure values according to SHS exposure after adjusting for possible confounding factors. All analyzes were stratified by women and men.

**Results:** There were 10,532 (women 8,987 and men 1,545) never smokers. We divided the subjects into three groups according to the amount of SHS exposure: none—group I, <2hr/day—group II, and  $\geq$ 2hr/day—group III. Using multivariate analysis, hypertension was more commonly associated with group III than group I in women (adjusted OR=1.50, 95% CI: 1.00–2.04,  $P=0.011$ ). Adjusted mean systolic and diastolic blood pressure values in women who was not taking antihypertensive medication were significantly elevated in group III by 2.3 and 1.7 mmHg respectively.

**Conclusion:** SHS exposure is significantly associated with hypertension in women never smokers.

1  
2  
3  
4  
5 Keywords: second-hand smoke, hypertension, blood pressure, KNHANES  
6  
7  
8  
9  
10  
11

## 12 **Strengths and limitations of this study**

- 13  
14  
15 ➤ This study demonstrated hypertension is more common in women never smokers  
16 with higher daily second-hand smoke (SHS) exposure and measured the  
17 differences of systolic and diastolic blood pressure means by different SHS  
18 exposure groups  
19  
20  
21  
22
- 23 ➤ This study included the largest population (10,532) used to examine SHS exposure  
24 based on a well-structured nationwide survey.  
25  
26
- 27 ➤ Survey design analysis was applied to reduce the possibility of biased estimates.  
28  
29
- 30 ➤ This cross-sectional analysis could not conclude a causal relationship between SHS  
31 exposure and hypertension.  
32  
33  
34  
35  
36  
37  
38  
39  
40  
41  
42  
43  
44  
45  
46  
47  
48  
49  
50  
51  
52  
53  
54  
55  
56  
57  
58  
59  
60

## INTRODUCTION

With a global prevalence of 26.4%,<sup>1</sup> hypertension is a large contributor to the burden of disease in adults. Well-known risk factor of hypertension is family history, but it is non-modifiable. Active cigarette smoking is another risk factor,<sup>2</sup> and it is totally preventable.<sup>3</sup>

Active smoking causes detrimental effects on smokers themselves, but second-hand smoke (SHS) exposure can also harm innocent bystanders. About 85% of SHS exposure results from sidestream smoke, which rises from the tip of a burning cigarette.<sup>4</sup> Sidestream smoke is potentially more harmful because it is not filtered. In recent years, the public has paid more attention to the harmful effect of SHS exposure on cardiovascular diseases<sup>5</sup> and supportive evidence is accumulating.<sup>6-8</sup> Although the positive relationship between SHS exposure and hypertension has been reported, some studies did not confirm this relationship.<sup>9</sup> In Korea, the adult smoking rate was 24.1% in 2013, and there was a big difference between sexes, 42.1% in men and 6.2% in women. In terms of the prevalence, women are more vulnerable to SHS exposure. The aim of this study was to elucidate the association between SHS exposure and hypertension in Korean never smokers using national survey data.

## MATERIALS AND METHODS

### Study population

1  
2  
3  
4  
5 The detailed data obtained from the fifth Korean National Health and Nutrition  
6 Examination Survey (KNHANES) V 2010-2012 are described elsewhere.<sup>10</sup> KNHANES  
7 is an annual collection of data from the Korean Statistical Office census of 3,800  
8 households from 576 randomly selected survey areas with the number selected from  
9 each area proportional to its size. Trained interviewers administer questionnaires on  
10 various health-related information, and subjects self-report their alcohol and smoking  
11 habits. KNHANES uses a complex, multi-stage probability sample design. The sample  
12 represents the total non-institutionalized civilian population of Korea. These data are  
13 available on the internet (<https://knhanes.cdc.go.kr>). Adult never smokers >20 years old  
14 with second hand smoking history available were included. Never smoker was defined  
15 when the total amount of smoking was <100 cigarettes during the lifetime. If histories  
16 of smoking or SHS exposure were not available, the cases were excluded. The  
17 institutional review board of Seoul National University Hospital waived the need for  
18 written informed consent from the participants (IRB no: H1509-011-699).

### 37 **Definition of SHS exposure**

38 Daily SHS exposure time was estimated both in the workplace and home. Total SHS  
39 exposure was calculated by the summation of both values. The total amount of SHS  
40 exposure was categorized into three groups according to exposure time; none (group I),  
41 <2hr/day (group II), and  $\geq$ 2hr/day (group III).

### 50 **Definition of hypertension**

51 Hypertension was defined if one or more of the criteria below were met. 1) diagnosed  
52 by physician, 2) using anti-hypertensive medications, 3) systolic blood pressure (BP)



1  
2  
3  
4  
5  $\geq 140$  mmHg, 4) diastolic BP  $\geq 90$  mmHg. The measurement of BP has been described  
6  
7 elsewhere.<sup>11</sup> In brief, after at least 5 minutes rest in a sitting position, BP was manually  
8  
9 measured 3 times at 30-second intervals. Finally, the average of the 2<sup>nd</sup> and 3<sup>rd</sup>  
10  
11 measurements were used.  
12

### 13 14 15 16 **Statistical analysis**

17  
18 Weighted analysis was used for the KNHANES V data.  $\chi^2$  test was used for categorical  
19  
20 variables and *t*-test was used for continuous variables in univariate analysis.<sup>12</sup>  
21  
22 Multivariable logistic regression with survey weight analysis was conducted to evaluate  
23  
24 the association between SHS exposure and hypertension. In model 1, the only co-  
25  
26 variable was age, while in model 2, multiple covariates such as age, height, weight,  
27  
28 waist circumference, serum triglyceride, fasting glucose, education, occupation, alcohol  
29  
30 intake, and marital status were included and adjusted for. In addition, we compared SBP  
31  
32 and DBP means between groups, again adjusting for covariates. This analysis was  
33  
34 limited to participants who were not taking antihypertensive medications. *P*-value  $< 0.05$   
35  
36 was considered significant. We used the STATA software version 13.1 (StataCorp,  
37  
38 College Station, Texas, US) for statistical analysis.  
39  
40  
41  
42  
43

### 44 **Patient and Public Involvement**

45  
46 The KNHANES V data were released after anonymization. The study population were  
47  
48 not involved in the design of this study.  
49  
50  
51  
52  
53

## 54 **RESULTS**

### **Baseline characteristics of participants**

The KNHANES V data include 25,534 participants. Among them, we found 19,259 adults (age >20 years old). After excluding 1,699 participants with unknown smoking history, 6,791 ever-smokers, and 236 with unknown SHS exposure, a total of 10,532 (women 8,987 and men 1,545) never smokers were available for analysis (Figure 1). Their mean age was  $47.7 \pm 0.3$  years in women and  $39.9 \pm 0.5$  years in men. The majority of the study population was light drinkers (<1/week), and socioeconomic status was evenly distributed by SHS exposure groups (Table 1). The percentages of participants categorized into group I, II, and III according to the degree of their SHS exposures were 68.1%, 24.2%, 7.7% in women and 53.3%, 39.4%, 7.2% in men. The participants in group I were older than those in the two other groups. The percentages of hypertension in group I, II, and III were 29.3%, 19.3%, 25.9% in women and 25.2%, 22.0%, 30.6% in men. BP, education level, alcohol intake were significantly different between the three SHS exposure groups.

### **Hypertension is associated with SHS exposure measured by questionnaire in women never smokers**

In women, hypertension was significantly associated with SHS exposure (group III) after adjustment for age (model 1, adjusted OR=1.49, 95% CI: 1.14–1.93,  $P=0.003$ ) and even after adjustment for age, height, weight, waist circumference, serum triglyceride, fasting glucose, education, occupation, alcohol intake, and marital status (model 2, adjusted OR=1.50, 95% CI: 1.10–2.04,  $P=0.011$ , Table 2). But in men no statistically significant differences were seen.

### **Systolic and diastolic blood pressure is increasing according to SHS exposure**

The mean systolic and diastolic BP increased proportional to the increasing SHS exposure in women. On average, the differences between group III and group I were 2.3 mmHg and 1.7 mmHg in systolic and diastolic BP, respectively ( $P=0.030$  and  $P=0.011$ ) (Figure 2). In men we observed a tendency toward higher mean systolic and diastolic BP values in groups II and III compared to group I.

### **DISCUSSION**

This study demonstrated the association between SHS exposure measured by self-reported questionnaire in women never smokers and hypertension, using a well-designed nationwide survey.<sup>13</sup> Our findings strengthen the evidence of the harmful effect of chronic SHS exposure on hypertension. Additionally, we calculated the difference in mean systolic and diastolic BP between women group I and III by 2.3 and 1.7 mmHg, respectively. According to a previous study, a 3mmHg systolic BP difference was observed with a 10 kg increase in body weight.<sup>14</sup> Compared to this 3 mmHg systolic BP change accomplished by weight reduction, the value of 2.3 mmHg associated with SHS exposure is significant.

The association between hypertension and SHS exposure was observed only in women. We postulate three possibilities. First, men never smokers were younger than women who never smoked ( $39.9\pm 0.5$  vs.  $47.7\pm 0.3$ ). The influence of SHS exposure on BP could be limited in younger man.<sup>15</sup> Second, SHS exposure could influence

1  
2  
3  
4  
5 cardiovascular disease due to sex-dependent biologic effect.<sup>16</sup> Third, there could be  
6  
7 some limitations of statistical model 2 for men because of the many co-variables and the  
8  
9 small numbers involved. The low statistical power due to small sample size could affect  
10  
11 results. In our dataset, the proportion of men never smokers was only 19.4% of total  
12  
13 men population aged over 20 years. Although we did not achieve statistically significant  
14  
15 results in men, the changing pattern of systolic and diastolic BP was the same, and it  
16  
17 could support the biologic effect between SHS exposure and BP.  
18  
19

20  
21  
22 Pharmacologically, nicotine stimulates the sympathetic nervous system in active  
23  
24 smokers.<sup>17 18</sup> Epinephrine and norepinephrine are released by nicotine stimulation, and  
25  
26 these catecholamines increase myocardial contractility and promote vasoconstriction,  
27  
28 which results in increases in BP.<sup>19</sup> The association between smoking and hypertension  
29  
30 has also been observed in a mouse model,<sup>20</sup> and in epidemiologic studies.<sup>2</sup> Moreover,  
31  
32 the amount of smoking was positively correlated with hypertension<sup>21</sup> and carotid artery  
33  
34 atherosclerosis severity.<sup>22</sup> The biologic effect of SHS exposure on BP could be  
35  
36 extrapolated from the effects of active smoking. Serum nicotine level was increased  
37  
38 after SHS exposure in healthy nonsmokers.<sup>23</sup> In the context of active smoking exposure,  
39  
40 the duration or amount of SHS exposure is also important in the evaluation of the  
41  
42 chronic effect of passive smoking. Although the experimental studies of short-term SHS  
43  
44 exposure did not demonstrate a change in BP.<sup>23 24</sup> population-based studies have shown  
45  
46 that the habitual SHS exposure is associated with hypertension.<sup>6 7</sup>  
47  
48  
49  
50

51  
52 Theoretically, SHS exposure can be determined by direct measurements of smoke  
53  
54 components in the air, self-reported questionnaires, or by measurements of biomarkers  
55  
56  
57

1  
2  
3  
4  
5 from body fluid, such as serum, urine or saliva.<sup>25</sup> The correlation between self-reported  
6  
7 questionnaire and biochemical assessment has been generally accurate in prior meta-  
8  
9 analysis.<sup>26</sup> The association between hypertension and SHS exposure was demonstrated  
10  
11 by using serum cotinine in the previous study<sup>6</sup> and self-reported questionnaire in our  
12  
13 study. Compared to biomarkers, self-reported questionnaires are inexpensive and  
14  
15 provide information on long-term exposure.  
16  
17

18  
19  
20 To our knowledge, this study included the largest population used to examine SHS  
21  
22 exposure based on a well-structured nationwide survey (KNHANES V),<sup>13</sup> and a survey  
23  
24 design analysis was applied to reduce the possibility of biased estimates.<sup>12</sup> In addition,  
25  
26 we included various potential confounding factors, including age, height, weight, waist  
27  
28 circumference, serum triglyceride, fasting glucose, education, occupation, alcohol  
29  
30 intake and marital status in the statistical model to clarify the conclusion. However there  
31  
32 were some limitations. First, our cross-sectional analysis could not conclude a causal  
33  
34 relationship between SHS exposure and hypertension. For example, in some cases,  
35  
36 hypertension may have been present before exposure to SHS. Second, information on  
37  
38 the smoke concentration and the environment where SHS exposure occurred was not  
39  
40 available. Third, we could not exclude hidden smokers. The proportion of cotinine-  
41  
42 verified active smokers was previously noted to be larger than that of self-reported  
43  
44 smokers.<sup>27</sup> In our dataset (KNHANES V), urine cotinine level was available in 19% of  
45  
46 women never smokers. In that group, 2.7% women never smokers had a urine cotinine  
47  
48 level >200 ng/mL, the cutoff value defining an active smoker.<sup>25</sup> Thus, the possibility of  
49  
50 active smoker contamination does exist. Forth, there could be concerns that factors  
51  
52 related to hypertension were not sufficiently investigated. For example, estrogen  
53  
54  
55  
56  
57

1  
2  
3  
4  
5 increases the susceptibility to hypertension.<sup>28</sup> Because estrogen tends to rise in  
6  
7 perimenopausal period, perimenopausal women hence are likely to become  
8  
9 hypertensive. Although our survey did not measure the estrogen level, the analysis in  
10  
11 which perimenopausal participants were excluded also shows the significant  
12  
13 relationship between SHS exposure and hypertension (data not shown). A family  
14  
15 history of hypertension could also contribute to the development of hypertension. We  
16  
17 did not exclude participants who had a family history of hypertension. However, even  
18  
19 when participants with a self-reported family history of hypertension were excluded, the  
20  
21 significant relationship between SHS exposure and hypertension was also observed  
22  
23 (data not shown).  
24  
25  
26  
27

28  
29 In conclusion, on using self-reported questionnaires, we found that SHS exposure was  
30  
31 significantly associated with hypertension in Korean women never smokers. Both  
32  
33 systolic and diastolic blood pressures were significantly elevated in the SHS exposed  
34  
35 population.  
36  
37  
38  
39  
40  
41  
42  
43  
44  
45  
46  
47  
48  
49  
50  
51  
52  
53  
54  
55  
56  
57

1  
2  
3  
4  
5 **Funding:** This research received no specific grant from any funding agency in the  
6 public, commercial or not-for-profit sectors.  
7  
8  
9

10  
11 **Competing interests:** None declared.  
12  
13

### 14 **Author Contributions**

15  
16 Conceptualization: YSP, CHL

17  
18 Data curation: YSP, CHL, YIL

19  
20 Methodology: YSP, CHL, KHY

21  
22 Project administration: CHL

23  
24 Original draft: YSP, CHL

25  
26 Review & editing: YSP, CHL, YIL, CMA, JOK, JHP, SHL, JYK, EMC, THJ, KHY  
27  
28  
29  
30  
31  
32

33 **Patient consent:** Waived from IRB  
34  
35  
36

37 **Ethics approval:** Seoul National University Hospital IRB  
38  
39  
40  
41

42 **Data sharing statement:** The original data came from Korean National Health and  
43 Nutritional Examination Survey (<https://knhanes.cdc.go.kr/knhanes/eng/index.do>). All  
44 the data presented this manuscript are available from the corresponding author at  
45 [kauri670@empal.com](mailto:kauri670@empal.com).  
46  
47  
48  
49  
50  
51

52 **Open Access:** This is an Open Access article distributed in accordance with the  
53 Creative Commons Attribution Non Commercial (CC BY-NC 4.0) license, which  
54  
55  
56  
57

1  
2  
3  
4  
5 permits others to distribute, remix, adapt, build upon this work non-commercially, and  
6  
7 license their derivative works on different terms, provided the original work is properly  
8  
9 cited and the use is non-commercial. See: [http://creativecommons.org/licenses/by-](http://creativecommons.org/licenses/by-nc/4.0/)  
10  
11 [nc/4.0/](http://creativecommons.org/licenses/by-nc/4.0/)  
12  
13  
14  
15  
16  
17  
18  
19  
20  
21  
22  
23  
24  
25  
26  
27  
28  
29  
30  
31  
32  
33  
34  
35  
36  
37  
38  
39  
40  
41  
42  
43  
44  
45  
46  
47  
48  
49  
50  
51  
52  
53  
54  
55  
56  
57  
58  
59  
60

For peer review only



**REFERENCES**

1. Bromfield S, Muntner P. High blood pressure: the leading global burden of disease risk factor and the need for worldwide prevention programs. *Curr Hypertens Rep* 2013;15:134-6.
2. Bowman TS, Gaziano JM, Buring JE, *et al*. A prospective study of cigarette smoking and risk of incident hypertension in women. *J Am Coll Cardiol* 2007;50:2085-92.
3. World Health Organization, World Heart Federation, World Stroke Organization. Global atlas on cardiovascular disease prevention and control. [http://www.who.int/cardiovascular\\_diseases/publications/atlas\\_cvd/en/](http://www.who.int/cardiovascular_diseases/publications/atlas_cvd/en/) Accessed Nov 27, 2017
4. Centers for Disease C. 1986 Surgeon General's report: the health consequences of involuntary smoking. *MMWR Morb Mortal Wkly Rep* 1986;35:769-70.
5. Jacobs M, Alonso AM, Sherin KM, *et al*. Policies to restrict secondhand smoke exposure: American College of Preventive Medicine Position Statement. *Am J Prev Med* 2013;45:360-7.
6. Alshaarawy O, Xiao J, Shankar A. Association of serum cotinine levels and hypertension in never smokers. *Hypertension* 2013;61:304-8.
7. Makris TK, Thomopoulos C, Papadopoulos DP, *et al*. Association of passive smoking with masked hypertension in clinically normotensive nonsmokers. *Am J Hypertens* 2009;22:853-9.
8. Li N, Li Z, Chen S, *et al*. Effects of passive smoking on hypertension in rural Chinese nonsmoking women. *J Hypertens* 2015;33:2210-4.

- 1  
2  
3  
4  
5 9. Xie B, Palmer PH, Pang Z, *et al*. Environmental tobacco use and indicators of  
6  
7 metabolic syndrome in Chinese adults. *Nicotine Tob Res* 2010;12:198-206.  
8  
9 10. Kweon S, Kim Y, Jang MJ, *et al*. Data resource profile: the Korea National Health  
10  
11 and Nutrition Examination Survey (KNHANES). *Int J Epidemiol* 2014;43:69-  
12  
13 77.  
14  
15 11. Lee HT, Shin J, Min SY, *et al*. The relationship between bone mineral density  
16  
17 and blood pressure in the Korean elderly population: the Korea National  
18  
19 Health and Nutrition Examination Survey, 2008-2011. *Clin Exp Hypertens*  
20  
21 2015;37:212-7.  
22  
23 12. Kim Y, Park S, Kim NS, *et al*. Inappropriate survey design analysis of the Korean  
24  
25 National Health and Nutrition Examination Survey may produce biased  
26  
27 results. *J Prev Med Public Health* 2013;46:96-104.  
28  
29 13. Kim Y. The Korea National Health and Nutrition Examination Survey  
30  
31 (KNHANES): current status and challenges. *Epidemiol Health*  
32  
33 2014;36:e2014002.  
34  
35 14. Poirier P, Giles TD, Bray GA, *et al*. Obesity and cardiovascular disease:  
36  
37 pathophysiology, evaluation, and effect of weight loss: an update of the  
38  
39 1997 American Heart Association Scientific Statement on Obesity and Heart  
40  
41 Disease from the Obesity Committee of the Council on Nutrition, Physical  
42  
43 Activity, and Metabolism. *Circulation* 2006;113:898-918.  
44  
45 15. Primatesta P, Falaschetti E, Gupta S, *et al*. Association between smoking and  
46  
47 blood pressure: evidence from the health survey for England. *Hypertension*  
48  
49 2001;37:187-93.  
50  
51  
52  
53  
54  
55  
56  
57  
58  
59  
60

- 1  
2  
3  
4  
5 16. Zhang M, An Q, Yeh F, *et al.* Smoking-attributable mortality in American Indians:  
6 findings from the Strong Heart Study. *Eur J Epidemiol* 2015;30:553-61.  
7  
8  
9 17. Grassi G, Seravalle G, Calhoun DA, *et al.* Mechanisms responsible for  
10 sympathetic activation by cigarette smoking in humans. *Circulation*  
11  
12 1994;90:248-53.  
13  
14  
15 18. Karakaya O, Barutcu I, Kaya D, *et al.* Acute effect of cigarette smoking on heart  
16 rate variability. *Angiology* 2007;58:620-4.  
17  
18  
19 19. Benowitz NL. Cigarette smoking and cardiovascular disease: pathophysiology  
20 and implications for treatment. *Prog Cardiovasc Dis* 2003;46:91-111.  
21  
22  
23 20. Talukder MA, Johnson WM, Varadharaj S, *et al.* Chronic cigarette smoking  
24 causes hypertension, increased oxidative stress, impaired NO bioavailability,  
25 endothelial dysfunction, and cardiac remodeling in mice. *Am J Physiol Heart*  
26  
27 *Circ Physiol* 2011;300:H388-96.  
28  
29  
30 21. Thuy AB, Blizzard L, Schmidt MD, *et al.* The association between smoking and  
31 hypertension in a population-based sample of Vietnamese men. *J Hypertens*  
32  
33 2010;28:245-50.  
34  
35  
36 22. Tell GS, Polak JF, Ward BJ, *et al.* Relation of smoking with carotid artery wall  
37 thickness and stenosis in older adults. The Cardiovascular Health Study.  
38  
39 The Cardiovascular Health Study (CHS) Collaborative Research Group.  
40  
41 *Circulation* 1994;90:2905-8.  
42  
43  
44 23. Argacha JF, Adamopoulos D, Gujic M, *et al.* Acute effects of passive smoking on  
45 peripheral vascular function. *Hypertension* 2008;51:1506-11.  
46  
47  
48  
49  
50  
51  
52  
53  
54  
55  
56  
57  
58  
59  
60

- 1  
2  
3  
4  
5 24. Hausberg M, Mark AL, Winniford MD, *et al.* Sympathetic and vascular effects of  
6  
7 short-term passive smoke exposure in healthy nonsmokers. *Circulation*  
8  
9 1997;96:282-7.  
10  
11 25. Florescu A, Ferrence R, Einarson T, *et al.* Methods for quantification of  
12  
13 exposure to cigarette smoking and environmental tobacco smoke: focus on  
14  
15 developmental toxicology. *Ther Drug Monit* 2009;31:14-30.  
16  
17 26. Patrick DL, Cheadle A, Thompson DC, *et al.* The validity of self-reported  
18  
19 smoking: a review and meta-analysis. *Am J Public Health* 1994;84:1086-93.  
20  
21 27. Jung-Choi KH, Khang YH, Cho HJ. Hidden female smokers in Asia: a comparison  
22  
23 of self-reported with cotinine-verified smoking prevalence rates in  
24  
25 representative national data from an Asian population. *Tob Control*  
26  
27 2012;21:536-42.  
28  
29 28. Subramanian M, Balasubramanian P, Garver H, *et al.* Chronic estradiol-17beta  
30  
31 exposure increases superoxide production in the rostral ventrolateral  
32  
33 medulla and causes hypertension: reversal by resveratrol. *Am J Physiol*  
34  
35 *Regul Integr Comp Physiol* 2011;300:R1560-8.  
36  
37  
38  
39  
40  
41  
42  
43  
44  
45  
46  
47  
48  
49  
50  
51  
52  
53  
54  
55  
56  
57  
58  
59  
60

1  
2  
3  
4  
5  
6  
7  
8  
9  
10  
11  
12  
13  
14  
15  
16  
17  
18  
19  
20  
21  
22  
23  
24  
25  
26  
27  
28  
29  
30  
31  
32  
33  
34  
35  
36  
37  
38  
39  
40  
41  
42  
43  
44  
45  
46  
47

1  
2

**Table 1. Baseline characteristics according to the degree of second-hand smoke exposure.**

| Variables                   | Women                      |           |           | <i>P</i> value | Men                        |           |           | <i>P</i> value |
|-----------------------------|----------------------------|-----------|-----------|----------------|----------------------------|-----------|-----------|----------------|
|                             | Second-hand smoke exposure |           |           |                | Second-hand smoke exposure |           |           |                |
|                             | None                       | <2hr/day  | ≥2hr/day  |                | None                       | <2hr/day  | ≥2hr/day  |                |
| % of total                  | 68.1                       | 24.2      | 7.7       |                | 53.3                       | 39.4      | 7.2       |                |
| Age (years)                 | 49.6±0.3                   | 42.9±0.4  | 45.2±0.6  | <0.001*        | 41.7±0.7                   | 37.4±0.6  | 40.2±1.4  | <0.001*        |
| Weight (kg)                 | 57.5±0.2                   | 57.5±0.3  | 59.2±0.5  | <0.001*        | 70.1±0.5                   | 71.4±0.6  | 72.7±1.4  | 0.032*         |
| Height (cm)                 | 156.6±0.1                  | 157.9±0.2 | 157.8±0.3 | <0.001*        | 171.4±0.3                  | 172.2±0.3 | 170.6±0.8 | 0.783          |
| Waist Circumference (cm)    | 78.7±0.2                   | 76.9±0.3  | 78.9±0.5  | 0.009*         | 82.9±0.4                   | 83.0±0.5  | 84.8±1.1  | 0.231          |
| BMI (kg/m <sup>2</sup> )    | 23.5±0.1                   | 23.1±0.1  | 23.8±0.2  | 0.536          | 23.8±0.1                   | 24.1±0.2  | 24.9±0.4  | 0.021*         |
| Blood pressure (mmHg)       |                            |           |           |                |                            |           |           |                |
| Systole                     | 117.5±0.3                  | 113.5±0.5 | 117.7±0.9 | <0.001*        | 119.3±0.6                  | 118.9±0.6 | 120.8±1.7 | 0.740          |
| Diastole                    | 74.0±0.2                   | 73.6±0.3  | 75.7±0.5  | 0.082          | 77.9±0.4                   | 79.9±0.5  | 79.9±1.1  | 0.005*         |
| Total cholesterol (mg/dL)   | 190.4±0.7                  | 186.5±1.0 | 192.9±1.8 | 0.453          | 183.±1.6                   | 182.7±1.8 | 186.5±3.8 | 0.666          |
| HDL (mg/dL)                 | 55.2±0.3                   | 55.6±0.6  | 57.7±1.1  | 0.068          | 51.0±0.9                   | 50.3±1.2  | 50.4±2.5  | 0.583          |
| Triglyceride (mg/dL)        | 115.0±1.8                  | 104.7±1.9 | 112.2±4.4 | 0.016*         | 121.8±3.5                  | 129.6±4.7 | 121.4±7.2 | 0.339          |
| Fasting glucose (mg/dL)     | 95.9±0.4                   | 93.6±0.5  | 95.1±0.9  | 0.008*         | 96.6±0.9                   | 95.7±0.8  | 96.6±1.8  | 0.658          |
| Hypertension                | 29.3                       | 19.3      | 25.9      | <0.001*        | 25.2                       | 22.0      | 30.6      | 0.197          |
| Diabetes mellitus           | 14.8                       | 9.8       | 10.0      | <0.001*        | 10.0                       | 9.2       | 13.1      | 0.527          |
| Metabolic syndrome          | 25.6                       | 17.0      | 18.8      | <0.001*        | 23.2                       | 20.2      | 12.9      | 0.325          |
| Alcohol intake              |                            |           |           | <0.001*        |                            |           |           | <0.001*        |
| Never drinker               | 21.7                       | 11.2      | 18.5      |                | 11.3                       | 7.3       | 7.4       |                |
| Former drinker              | 18.0                       | 13.9      | 16.5      |                | 13.5                       | 6.1       | 5.9       |                |
| Light drinker (≤1/week)     | 53.9                       | 66.8      | 57.3      |                | 56.7                       | 66.5      | 53.8      |                |
| Moderate drinker (2-3/week) | 5.1                        | 7.1       | 6.2       |                | 13.9                       | 16.5      | 22.4      |                |

|                                 |      |      |      |         |      |      |      |         |
|---------------------------------|------|------|------|---------|------|------|------|---------|
| Heavy drinker ( $\geq 4$ /week) | 1.3  | 1.0  | 1.5  |         | 4.7  | 3.6  | 10.5 |         |
| Marital status                  | 88.8 | 76.9 | 84.1 | <0.001* | 58.0 | 59.0 | 59.0 | 0.955   |
| Educational level               |      |      |      | <0.001* |      |      |      | <0.001* |
| Below middle school             | 30.4 | 18.2 | 26.8 |         | 9.9  | 2.9  | 7.7  |         |
| Middle school                   | 9.8  | 9.9  | 10.2 |         | 6.2  | 6.4  | 9.0  |         |
| High school                     | 29.8 | 39.9 | 33.1 |         | 43.0 | 40.3 | 47.6 |         |
| Above high school               | 30.1 | 31.9 | 30.0 |         | 40.9 | 50.5 | 35.8 |         |
| Socioeconomic status            |      |      |      | 0.144   |      |      |      | 0.116   |
| 1Q                              | 25.3 | 25.3 | 27.3 |         | 30.2 | 21.8 | 30.5 |         |
| 2Q                              | 26.8 | 25.7 | 21.2 |         | 21.2 | 24.4 | 20.0 |         |
| 3Q                              | 25.3 | 25.9 | 23.7 |         | 25.6 | 25.5 | 26.8 |         |
| 4Q                              | 22.6 | 23.1 | 27.9 |         | 23.0 | 28.3 | 22.7 |         |
| Occupation                      |      |      |      | <0.001* |      |      |      | <0.001* |
| Manager or professional         | 11.0 | 15.6 | 11.8 |         | 21.8 | 28.6 | 12.5 |         |
| Office worker                   | 5.0  | 14.3 | 13.3 |         | 7.6  | 15.5 | 15.6 |         |
| Service                         | 9.0  | 22.3 | 42.4 |         | 7.1  | 15.0 | 13.8 |         |
| Farmer worker or fisherman      | 6.0  | 5.6  | 5.0  |         | 7.6  | 6.2  | 1.3  |         |
| Technician                      | 2.3  | 4.8  | 4.2  |         | 9.1  | 21.5 | 39.5 |         |
| Labor worker                    | 8.0  | 12.8 | 11.6 |         | 5.3  | 5.8  | 9.2  |         |
| Unemployed (outside house)      | 58.8 | 24.7 | 17.4 |         | 41.6 | 7.6  | 8.2  |         |

The data were presented as mean $\pm$ standard error in continuous variables and % in categorical variables.

BMI, body mass index; SHS, second-hand smoke

\* $P < 0.05$

**Table 2. Association between second-hand smoke (SHS) exposure and hypertension.**

| For hypertension | Women                |             |         |                      |             |         | Men                  |           |         |                      |           |         |
|------------------|----------------------|-------------|---------|----------------------|-------------|---------|----------------------|-----------|---------|----------------------|-----------|---------|
|                  | Model 1 <sup>a</sup> |             |         | Model 2 <sup>b</sup> |             |         | Model 1 <sup>a</sup> |           |         | Model 2 <sup>b</sup> |           |         |
|                  | aOR                  | 95% CI      | P value | aOR                  | 95% CI      | P value | aOR                  | 95% CI    | P value | aOR                  | 95% CI    | P value |
| SHS exposure     |                      |             |         |                      |             |         |                      |           |         |                      |           |         |
| None             | 1                    |             |         | 1                    |             |         | 1                    |           |         | 1                    |           |         |
| < 2hr/day        | 1.06                 | 0.90 – 1.25 | 0.487   | 1.01                 | 0.91 – 1.33 | 0.314   | 1.07                 | 0.78-1.47 | 0.664   | 0.87                 | 0.60-1.25 | 0.435   |
| ≥ 2hr/day        | 1.49                 | 1.14 – 1.93 | 0.003** | 1.50                 | 1.10 – 2.04 | 0.011*  | 1.52                 | 0.89-2.61 | 0.128   | 0.93                 | 0.52-1.68 | 0.818   |

<sup>a</sup>Adjusted for age.

<sup>b</sup>Adjusted for age, height, weight, waist circumference, serum triglyceride, fasting glucose, education, occupation, alcohol intake, and marital status.

aOR, adjusted odds ratio; CI, confidence interval; SHS, second-hand smoke

\*P<0.05; \*\*P<0.01

1  
2  
3 17 Figure 1. Flow diagram of study population.  
4

5 18

6  
7 19 Figure 2. Adjusted means of systolic and diastolic blood pressure according to  
8  
9 20 second-hand smoke exposure in women (A and B) and men (C and D) population  
10  
11 21 without antihypertensive treatment. The mean values are adjusted for age, height,  
12  
13 22 weight, waist circumference, serum triglyceride, fasting glucose, education,  
14  
15 23 occupation, alcohol intake, and marital status.  
16  
17

18 24

19  
20 25  
21  
22  
23  
24  
25  
26  
27  
28  
29  
30  
31  
32  
33  
34  
35  
36  
37  
38  
39  
40  
41  
42  
43  
44  
45  
46  
47  
48  
49  
50  
51  
52  
53  
54  
55  
56  
57  
58  
59  
60



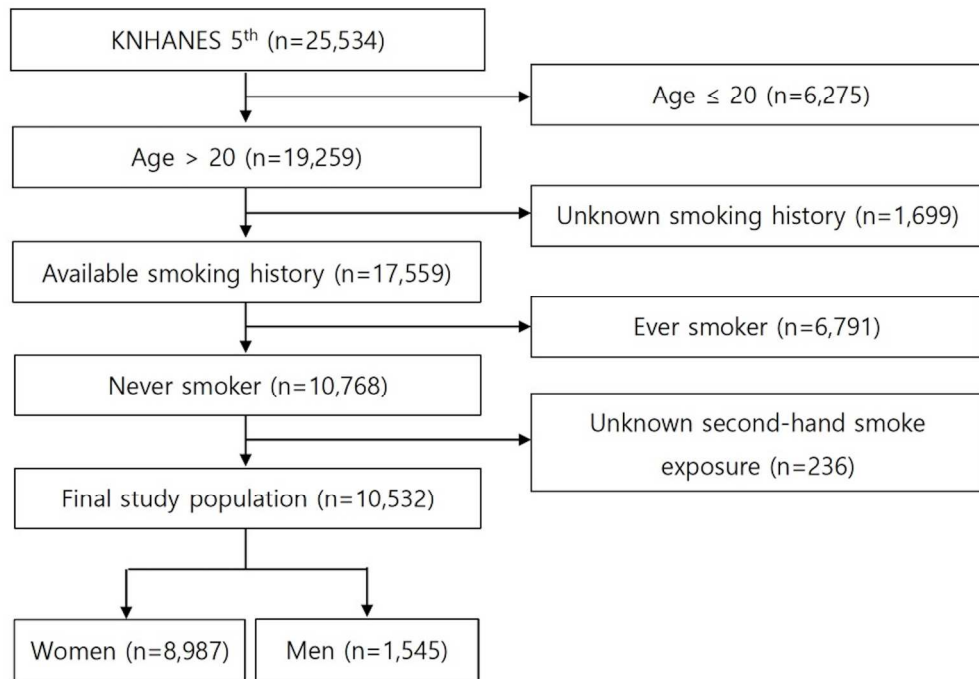

Figure 1. Flow diagram of study population.

199x139mm (300 x 300 DPI)

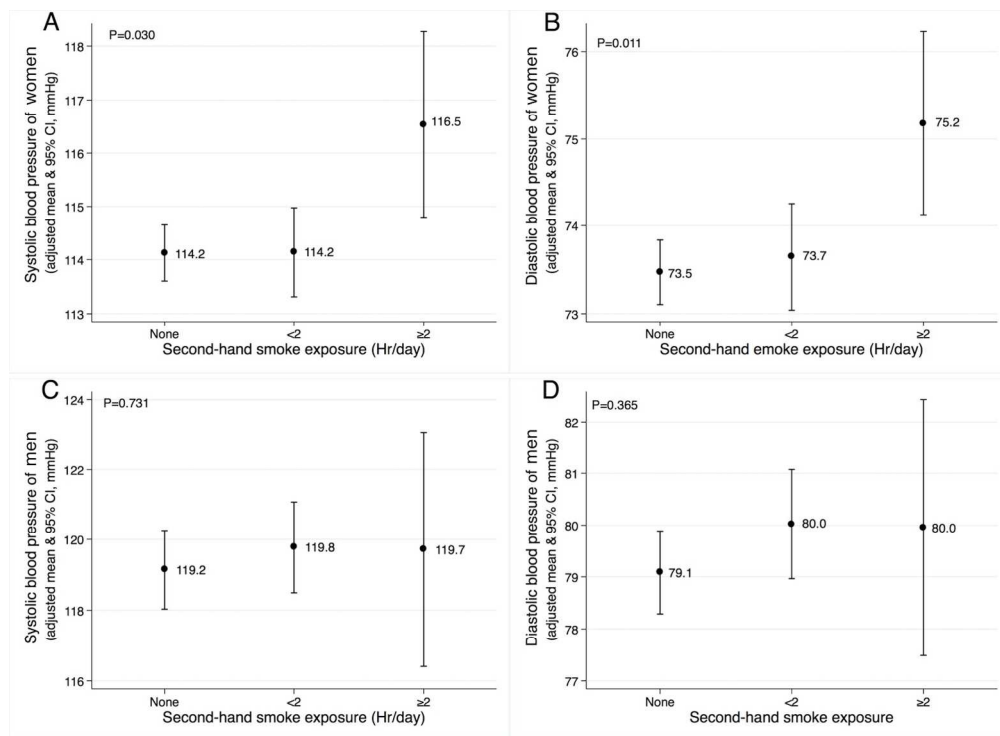

Figure 2. Adjusted means of systolic and diastolic blood pressure according to second-hand smoke exposure in women (A and B) and men (C and D) population without antihypertensive treatment. The mean values are adjusted for age, height, weight, waist circumference, serum triglyceride, fasting glucose, education, occupation, alcohol intake, and marital status.

199x146mm (300 x 300 DPI)

**STROBE 2007 (v4) checklist of items to be included in reports of observational studies in epidemiology\***  
**Checklist for cohort, case-control, and cross-sectional studies (combined)**

| Section/Topic             | Item # | Recommendation                                                                                                                                                                                                                                                                                                                                                                                                                                                         | Reported on page # |
|---------------------------|--------|------------------------------------------------------------------------------------------------------------------------------------------------------------------------------------------------------------------------------------------------------------------------------------------------------------------------------------------------------------------------------------------------------------------------------------------------------------------------|--------------------|
| Title and abstract        | 1      | (a) Indicate the study’s design with a commonly used term in the title or the abstract                                                                                                                                                                                                                                                                                                                                                                                 | 1                  |
|                           |        | (b) Provide in the abstract an informative and balanced summary of what was done and what was found                                                                                                                                                                                                                                                                                                                                                                    | 3                  |
| <b>Introduction</b>       |        |                                                                                                                                                                                                                                                                                                                                                                                                                                                                        |                    |
| Background/rationale      | 2      | Explain the scientific background and rationale for the investigation being reported                                                                                                                                                                                                                                                                                                                                                                                   | 5                  |
| Objectives                | 3      | State specific objectives, including any pre-specified hypotheses                                                                                                                                                                                                                                                                                                                                                                                                      | 5                  |
| <b>Methods</b>            |        |                                                                                                                                                                                                                                                                                                                                                                                                                                                                        |                    |
| Study design              | 4      | Present key elements of study design early in the paper                                                                                                                                                                                                                                                                                                                                                                                                                | 6                  |
| Setting                   | 5      | Describe the setting, locations, and relevant dates, including periods of recruitment, exposure, follow-up, and data collection                                                                                                                                                                                                                                                                                                                                        | 6                  |
| Participants              | 6      | (a) <i>Cohort study</i> —Give the eligibility criteria, and the sources and methods of selection of participants. Describe methods of follow-up<br><i>Case-control study</i> —Give the eligibility criteria, and the sources and methods of case ascertainment and control selection. Give the rationale for the choice of cases and controls<br><i>Cross-sectional study</i> —Give the eligibility criteria, and the sources and methods of selection of participants | 6                  |
|                           |        | (b) <i>Cohort study</i> —For matched studies, give matching criteria and number of exposed and unexposed<br><i>Case-control study</i> —For matched studies, give matching criteria and the number of controls per case                                                                                                                                                                                                                                                 | 6                  |
| Variables                 | 7      | Clearly define all outcomes, exposures, predictors, potential confounders, and effect modifiers. Give diagnostic criteria, if applicable                                                                                                                                                                                                                                                                                                                               | 6                  |
| Data sources/ measurement | 8*     | For each variable of interest, give sources of data and details of methods of assessment (measurement). Describe comparability of assessment methods if there is more than one group                                                                                                                                                                                                                                                                                   | 6                  |
| Bias                      | 9      | Describe any efforts to address potential sources of bias                                                                                                                                                                                                                                                                                                                                                                                                              | 5-6                |
| Study size                | 10     | Explain how the study size was arrived at                                                                                                                                                                                                                                                                                                                                                                                                                              | 6                  |
| Quantitative variables    | 11     | Explain how quantitative variables were handled in the analyses. If applicable, describe which groupings were chosen and why                                                                                                                                                                                                                                                                                                                                           | 6                  |
| Statistical methods       | 12     | (a) Describe all statistical methods, including those used to control for confounding                                                                                                                                                                                                                                                                                                                                                                                  | 7                  |
|                           |        | (b) Describe any methods used to examine subgroups and interactions                                                                                                                                                                                                                                                                                                                                                                                                    | NE                 |
|                           |        | (c) Explain how missing data were addressed                                                                                                                                                                                                                                                                                                                                                                                                                            | 6                  |
|                           |        | (d) <i>Cohort study</i> —If applicable, explain how loss to follow-up was addressed<br><i>Case-control study</i> —If applicable, explain how matching of cases and controls was addressed                                                                                                                                                                                                                                                                              | 6                  |

|                          |     |                                                                                                                                                                                                              |          |
|--------------------------|-----|--------------------------------------------------------------------------------------------------------------------------------------------------------------------------------------------------------------|----------|
|                          |     | <i>Cross-sectional study</i> —If applicable, describe analytical methods taking account of sampling strategy                                                                                                 |          |
|                          |     | (e) Describe any sensitivity analyses                                                                                                                                                                        | NE       |
| <b>Results</b>           |     |                                                                                                                                                                                                              |          |
| Participants             | 13* | (a) Report numbers of individuals at each stage of study—eg numbers potentially eligible, examined for eligibility, confirmed eligible, included in the study, completing follow-up, and analysed            | 6        |
|                          |     | (b) Give reasons for non-participation at each stage                                                                                                                                                         | 6        |
|                          |     | (c) Consider use of a flow diagram                                                                                                                                                                           | Figure 1 |
| Descriptive data         | 14* | (a) Give characteristics of study participants (eg demographic, clinical, social) and information on exposures and potential confounders                                                                     | 7-8      |
|                          |     | (b) Indicate number of participants with missing data for each variable of interest                                                                                                                          | 7-8      |
|                          |     | (c) <i>Cohort study</i> —Summarise follow-up time (eg, average and total amount)                                                                                                                             |          |
| Outcome data             | 15* | <i>Cohort study</i> —Report numbers of outcome events or summary measures over time                                                                                                                          |          |
|                          |     | <i>Case-control study</i> —Report numbers in each exposure category, or summary measures of exposure                                                                                                         |          |
|                          |     | <i>Cross-sectional study</i> —Report numbers of outcome events or summary measures                                                                                                                           | 8        |
| Main results             | 16  | (a) Give unadjusted estimates and, if applicable, confounder-adjusted estimates and their precision (eg, 95% confidence interval). Make clear which confounders were adjusted for and why they were included | 8        |
|                          |     | (b) Report category boundaries when continuous variables were categorized                                                                                                                                    | 8        |
|                          |     | (c) If relevant, consider translating estimates of relative risk into absolute risk for a meaningful time period                                                                                             | NE       |
| Other analyses           | 17  | Report other analyses done—eg analyses of subgroups and interactions, and sensitivity analyses                                                                                                               | NE       |
| <b>Discussion</b>        |     |                                                                                                                                                                                                              |          |
| Key results              | 18  | Summarise key results with reference to study objectives                                                                                                                                                     | 8        |
| Limitations              | 19  | Discuss limitations of the study, taking into account sources of potential bias or imprecision. Discuss both direction and magnitude of any potential bias                                                   | 10-11    |
| Interpretation           | 20  | Give a cautious overall interpretation of results considering objectives, limitations, multiplicity of analyses, results from similar studies, and other relevant evidence                                   | 10-11    |
| Generalisability         | 21  | Discuss the generalisability (external validity) of the study results                                                                                                                                        | NE       |
| <b>Other information</b> |     |                                                                                                                                                                                                              |          |
| Funding                  | 22  | Give the source of funding and the role of the funders for the present study and, if applicable, for the original study on which the present article is based                                                | NE       |

\*Give information separately for cases and controls in case-control studies and, if applicable, for exposed and unexposed groups in cohort and cross-sectional studies.

**Note:** An Explanation and Elaboration article discusses each checklist item and gives methodological background and published examples of transparent reporting. The STROBE checklist is best used in conjunction with this article (freely available on the Web sites of PLoS Medicine at <http://www.plosmedicine.org/>, Annals of Internal Medicine at <http://www.annals.org/>, and Epidemiology at <http://www.epidem.com/>). Information on the STROBE Initiative is available at [www.strobe-statement.org](http://www.strobe-statement.org).
